# Supplementary material for: Coordinated Regulation of Intestinal Functions in C. elegans by LIN-35/Rb and SLR-2
Source: PLoS Genet. 2008 Apr 25;4(4):e1000059. doi: 10.1371/journal.pgen.1000059 (PMC2312330; doi:10.1371/journal.pgen.1000059)
Supplement: Figure S2 — SLR-2-responsive genes. A complete list of the 1736 genes that showed differential expression in a slr-2 mutant strain. The column labeled “Probesets” refers to Affymetrix probe set numbers, the column referred to as “mountain” refers to gene mountains, described in Kim, et al, 2001. (0.27 MB XLS) [file pgen.1000059.s002.xls]

## Sheet: list
Probesets	N2 L1	slr L1	Mean fold	Common name	Gene	Mountain
192447_at	1194.02	617.591	-1.93336	nas-6	4R79.1	10
187450_at	681.187	353.142	-1.92894		6R55.1	5
187914_s_at	589.5	322.414	-1.8284	soc-2	AC7.2	1
178588_s_at	256.696	156.879	-1.63627	amx-2	B0019.1	1
193340_at	295.909	176.867	-1.67306	vps-34	B0025.1	2
188123_at	627.687	997.771	1.5896		B0035.13	8
189639_at	206.401	87.376	-2.36222	dnj-1	B0035.14	1
172758_x_at	1113.63	416.863	-2.67146	his-48	B0035.8
181834_at	107.697	49.8483	-2.16049		B0205.1	11
187874_at	2376.12	1147.84	-2.07008	kin-3	B0205.7
172388_x_at	163.78	259.86	1.58664	nlp-27	B0213.2	8
188358_at	648.437	992.843	1.53113		B0218.1	8
180562_at	191.091	416.811	2.18122		B0218.8	8
174732_s_at	71.5108	115.438	1.61427		B0222.9	8
185026_at	238.562	656.277	2.75097		B0238.12	6
180054_at	212.821	140.792	-1.5116		B0261.1	2
188271_at	301.576	124.863	-2.41525	let-363	B0261.2	5
192135_at	844.777	1284.04	1.51997		B0272.4	24
193628_at	201.947	100.164	-2.01617		B0285.1	5
186851_at	191.819	107.832	-1.77887	hse-5	B0285.5	2
180568_at	79.0326	125.887	1.59285		B0294.3
187865_at	3087.94	1880.65	-1.64196	arf-1	B0336.2	2
182172_at	310.455	102.759	-3.02118	wrt-9	B0344.2	14
191075_s_at	147.386	71.0439	-2.07458	egl-8	B0348.4	1
192017_s_at	225.976	96.2203	-2.34853	ife-3	B0348.6	7
181045_at	304.12	77.4532	-3.9265	unc-44	B0350.2	1
189182_at	374.616	148.588	-2.52117		B0361.10	10
190760_at	468.23	303.244	-1.54407		B0395.2	14
189389_at	45.8997	79.8168	1.73894	sri-30	B0454.10
182605_s_at	109.216	165.277	1.51331		B0454.9	5
193400_s_at	487.267	189.358	-2.57326	spk-1	B0464.5	5
189623_at	395.135	126.816	-3.11581		B0491.7	2
187297_s_at	540.333	292.972	-1.84431		B0495.7	2
187747_at	592.743	302.835	-1.95731		B0496.3	1
174892_at	232.455	134.567	-1.72743	lin-66	B0513.1	1
187116_s_at	249.634	100.02	-2.49584		B0513.5	16
188452_s_at	116.267	39.6068	-2.93552	fli-1	B0523.5	5
191700_s_at	287.891	99.8045	-2.88455	tpa-1	B0545.1
190060_at	1736.29	1108.71	-1.56605		B0546.1	23
175754_s_at	779.574	394.104	-1.97809		B0564.1	20
193233_at	413.417	135.317	-3.05518		C01A2.3	2
185299_s_at	367.462	71.5185	-5.138	drh-2	C01B10.1	6
185295_s_at	222.079	356.4	1.60483		C01B10.3	19
183943_at	51.0977	81.3241	1.59154		C01F1.4	0
193008_at	144.558	85.4837	-1.69106	tag-60	C01F6.6	27
182559_at	223.986	382.553	1.70793		C01G10.6	8
184190_at	242.577	134.549	-1.8029		C01G12.1	14
172469_x_at	572.126	275.037	-2.08018		C01G12.6	29
182814_at	284.212	178.215	-1.59477		C01G5.2	7
192803_at	174.68	108.016	-1.61717		C01G6.4	2
192582_at	444.471	151.593	-2.932		C01G6.5	5
192200_at	516.441	278.646	-1.8534		C01G6.6	41
193362_at	539.595	315.311	-1.71131	cam-1	C01G6.8	5
176722_at	503.93	97.1962	-5.18467		C01G8.9
185557_s_at	1563.68	2397.1	1.53299	lys-7	C02A12.4	8
188161_s_at	154.98	47.3899	-3.27031	dyn-1	C02C6.1
179309_at	153.46	56.0854	-2.73618		C02C6.2	1
176818_s_at	483.066	300.745	-1.60623		C02F12.7	1
192749_at	472.441	83.041	-5.68925	tax-6	C02F4.2	1
172360_x_at	2345.77	1393	-1.68396	pqn-5	C03A7.4	29
172323_x_at	2318.89	1264.29	-1.83414	abu-6	C03A7.7	29
189878_at	873.016	479.17	-1.82193	kin-19	C03C10.1	1
192337_at	66.6993	28.3538	-2.3524	cel-1	C03D6.3	5
194223_x_at	1190.23	762.24	-1.56149	nspc-6	C03G5.13
191722_at	44.379	77.448	1.74515		C03G6.10	0
185286_at	48.7265	194.719	3.99616		C03G6.13	3
184101_at	45.9222	77.369	1.68478	srx-56	C03G6.2	9
187748_s_at	461.37	301.028	-1.53265	egl-27	C04A2.3	0
180849_at	323.331	179.402	-1.80227		C04C11.2	1
194166_s_at	2174.78	1288.34	-1.68804		C04C3.3	20
182922_s_at	127.665	494.796	3.87575		C04F12.1	5
184160_at	107.848	172.753	1.60182		C04F12.9	11
178948_at	161.443	77.9357	-2.07148		C05A9.2	0
189960_at	46.7748	88.0229	1.88184		C05C10.1	9
188899_s_at	150.2	93.7592	-1.60198		C05C10.2	5
180465_at	131.11	210.244	1.60358		C05C8.1	7
191957_at	1284.06	649.938	-1.97566		C05C8.7	24
173637_s_at	465.751	236.43	-1.96993		C05D10.1	9
187862_at	308.24	186.005	-1.65716		C05D10.4	6
188194_at	110.294	52.8045	-2.08872	let-756	C05D11.4	0
184125_at	290.529	168.563	-1.72356		C05D12.1	1
175077_s_at	569.746	961.734	1.688		C05D12.3
187761_s_at	496.031	928.544	1.87195		C05D2.8	19
193404_at	184.177	126.94	-1.4647	ife-4	C05D9.5	0
185566_at	161.256	75.357	-2.1399		C05E11.3	0
188353_s_at	902.186	1556.3	1.72503	flp-12	C05E11.8	6
177489_at	625.064	370.423	-1.68744		C05E7.2
190782_at	371.14	158.159	-2.34662	tmd-1	C06A5.7	1
173556_s_at	1674.32	821.691	-2.03765		C06A8.1	5
192246_s_at	477.09	303.968	-1.56954	mel-11	C06C3.1	2
187886_at	235.499	106.49	-2.21147		C06E1.10	9
176026_at	79.7263	27.958	-2.85164		C06E1.3	13
181731_at	143.802	76.4283	-1.88152		C06E2.1	14
192191_s_at	504.106	168.363	-2.99417		C06E7.1	20
192547_s_at	1111.5	661.582	-1.68006		C06E7.3	20
183601_at	323.531	193.043	-1.67595		C06E7.4	14
193999_at	311.182	142.847	-2.17843		C06G1.4	1
190904_s_at	244.39	133.995	-1.82387		C06G1.5	1
193643_s_at	367.369	144.023	-2.55077		C06G3.7
179572_at	332.609	182.461	-1.8229		C06H5.7
185246_at	186.05	313.726	1.68625		C07A12.2	6
191220_at	527.067	270.076	-1.95155	tlk-1	C07A9.3	5
185476_at	171.053	89.8734	-1.90327		C07D10.2	11
190877_at	615.509	324.337	-1.89774	nas-7	C07D10.4	16
176768_at	147.973	60.3519	-2.45184	tol-1	C07F11.1
179973_s_at	431.816	261.113	-1.65375	pqn-9	C07G1.5	5
172407_x_at	1020.82	465.319	-2.1938		C07G2.2	2
187802_at	606.302	126.923	-4.77691	cgh-1	C07H6.5	7
189637_at	182.278	87.1204	-2.09226	lin-39	C07H6.7	1
176083_s_at	75.9063	44.5672	-1.70319	cux-7	C07H6.8
192617_at	48.0309	86.1633	1.79392	sod-3	C08A9.1	15
193506_at	267.177	129.773	-2.05879	zyg-11	C08B11.1	7
191135_s_at	359.292	208.791	-1.72082		C08B11.3	9
176579_s_at	420.363	229.874	-1.82867	mab-5	C08C3.3	10
172481_x_at	161.447	53.9681	-2.99153		C08F1.4	31
184129_at	500.429	784.782	1.56822		C08F11.1	6
191193_at	334.932	217.793	-1.53785		C08F8.2	2
193077_at	1753.81	1011.83	-1.7333		C08H9.2	5
187538_at	186.548	93.1761	-2.0021	ipp-5	C09B8.1	1
189196_at	272.222	133.676	-2.03644	unc-89	C09D1.1	1
180389_s_at	82.7669	42.9056	-1.92905		C09D4.1	6
194134_at	754.218	456.43	-1.65243	ptp-3	C09D8.1	1
177549_s_at	164.435	63.2676	-2.59904		C09F9.2	1
173473_s_at	603.042	283.673	-2.12583	hyl-1	C09G4.1	20
188622_at	385.911	867.609	2.24821		C09G5.5
194092_s_at	289.936	169.399	-1.71155	lin-10	C09H6.2	5
189649_s_at	378.733	201.486	-1.8797		C10E2.6	5
186361_at	987.27	496.703	-1.98765		C10G11.7
193572_at	120.831	59.4068	-2.03395	ncx-2	C10G8.5	1
185328_at	149.046	69.9053	-2.13212		C10H11.4	21
185055_at	314.784	171.472	-1.83577		C10H11.6	21
192743_s_at	209.201	99.1346	-2.11028	let-502	C10H11.9	9
190966_at	317.481	718.148	2.26202		C11E4.2	6
192762_at	365.41	154.685	-2.36229		C11H1.3	1
187703_s_at	130.395	44.4727	-2.93201	lin-41	C12C8.3	5
190090_at	36.1594	67.7848	1.87461		C12D5.2	12
184149_at	63.6684	339.195	5.32753		C12D5.3	8
189430_at	429.96	214.999	-1.99983		C12D5.7	24
187197_s_at	250.33	61.5301	-4.06842		C13B9.1	1
180960_at	464.311	304.349	-1.52559		C13C12.2	14
179282_at	43.533	70.962	1.63007		C13C4.6	8
192821_at	227.669	112.743	-2.01936	tag-150	C14A11.3	1
181775_at	422.579	218.246	-1.93625		C14A4.14
179323_s_at	72.8865	121.704	1.66977		C14A6.2	15
175876_at	67.2292	18.6514	-3.60452	gei-8	C14B9.6
180508_s_at	519.442	237.15	-2.19035		C14C10.4	2
185795_at	1356.93	718.65	-1.88817	pqn-13	C14C11.8	14
187892_at	155.762	75.2582	-2.0697	sem-5	C14F5.5	1
189558_at	209.662	120.769	-1.73606		C14H10.3	13
188969_at	42.8463	73.0789	1.70561		C15A11.4	22
188975_at	146.255	301.393	2.06073		C15A11.7	8
177586_at	1064.08	343.935	-3.09383		C15C6.1	14
191322_at	72.838	122.342	1.67965		C15H11.2	3
193024_at	86.8978	167.294	1.92519	nnt-1	C15H9.1	17
175267_at	281.018	496.14	1.76551		C15H9.11
189828_s_at	4723.97	3129.89	-1.50931	hsp-3	C15H9.6
193832_at	345.096	226.327	-1.52477		C16C10.5	20
193467_s_at	559.814	355.721	-1.57375	eat-16	C16C2.2	1
173772_at	69.0239	110.471	1.60047	rol-3	C16D9.2	1
187959_s_at	73.6523	30.6697	-2.40147	inx-1	C16E9.4	1
184450_at	63.4402	97.1721	1.53171		C17B7.11	19
181325_s_at	65.1287	113.736	1.74633		C17B7.2	6
190705_s_at	376.748	71.9975	-5.2328	acdh-2	C17C3.12
173996_at	199.934	52.8668	-3.78185	ins-13	C17C3.18
173224_s_at	50.533	84.4795	1.67177	map-2	C17C3.4	6
191948_s_at	492.49	301.391	-1.63406	pab-3	C17E4.5	18
189555_at	195.331	88.7857	-2.20003		C17E4.6	11
193585_at	245.761	88.2132	-2.78599		C17E4.9	2
189484_at	420.414	248.417	-1.69237		C17G1.7	1
184346_at	692.87	372.519	-1.85996		C17H12.1	2
184562_at	490.493	874.297	1.78248		C18A11.2	6
190103_at	768.425	338.454	-2.2704		C18A3.5	5
192901_s_at	258.953	121.152	-2.13743		C18B12.4
176748_s_at	189.035	88.5797	-2.13406		C18C4.5	1
192452_at	156.541	92.0133	-1.70128	die-1	C18D1.1	1
183350_at	936.933	568.611	-1.64776		C18D11.1	1
186792_at	859.726	457.928	-1.87742		C18E9.6	20
192365_s_at	455.231	200.882	-2.26616		C18E9.7	1
190677_at	300.38	134.418	-2.23468	sax-7	C18F3.2	5
181199_at	24.0188	68.2554	2.84175		C18H7.1	10
190256_s_at	330.466	185.1	-1.78534	rpy-1	C18H9.7	1
185849_s_at	152.647	44.5834	-3.42385		C23F12.1	1
193503_s_at	446.689	222.251	-2.00984	rpn-2	C23G10.4
186391_s_at	170.546	102.23	-1.66825		C23G10.7	11
181967_at	1581.07	2480.51	1.56888		C24A1.1	6
192843_at	351.024	173.191	-2.0268	coq-1	C24A11.9	2
175591_s_at	682.416	413.309	-1.6511		C24B9.3	8
173335_s_at	808.815	1747.7	2.16082		C24B9.9	15
192610_at	360.88	183.82	-1.96323	nas-12	C24F3.3	3
181111_at	151.198	99.5076	-1.51946	grl-1	C24G6.7	14
185553_at	230.536	133.048	-1.73272		C24H10.1	1
183917_at	240.892	57.7614	-4.17047		C24H11.7
172967_x_at	393.43	168.733	-2.33167	aha-1	C25A1.11	1
193032_s_at	553.194	343.52	-1.61037		C25A1.5	11
188333_s_at	365.139	148.939	-2.45161	ajm-1	C25A11.4	1
189763_at	137.383	76.697	-1.79124	rap-2	C25D7.7	5
185690_at	420.052	692.926	1.64962		C25E10.8	8
191562_at	320.198	131.892	-2.42773	dlg-1	C25F6.2	1
190414_at	335.008	171.475	-1.95369	tsp-9	C25G6.2	1
183285_at	79.9056	125.36	1.56886		C26B2.2	4
175093_at	103.21	197.846	1.91693		C26B9.7
193458_s_at	586.485	114.134	-5.13857	goa-1	C26C6.2	5
189987_s_at	96.5316	56.589	-1.70584	nas-36	C26C6.3	29
177435_at	164.648	58.2069	-2.82867	dcp-66	C26C6.5	1
192876_at	692.033	382.164	-1.81083	ran-3	C26D10.1	11
AFFX-r2-3487-5_s_at	1894.53	1047.48	-1.80865	hel-1	C26D10.2	20
172588_x_at	314.531	506.41	1.61005		C26F1.10	6
189264_s_at	33.9739	86.977	2.56011		C26F1.2
184758_at	301.028	150.497	-2.00023		C27A12.8	2
190315_at	338.837	180.173	-1.88062	rap-1	C27B7.8	2
192641_s_at	209.453	80.9864	-2.58627	nhr-74	C27C7.3	1
191777_at	546.121	336.233	-1.62423		C27H5.3	5
185774_s_at	2540.39	5563.36	2.18996	spp-8	C28C12.5	8
185955_at	1294.58	2276.16	1.75822	spp-10	C28C12.7	8
189385_s_at	543.761	346.036	-1.5714		C29F7.3	24
186257_s_at	1798.96	1101.67	-1.63295		C29H12.2	20
175911_at	113.819	58.9558	-1.93057		C30A5.6	0
176242_at	1119.97	700.544	-1.59872		C30C11.1	2
176607_s_at	1764.69	1088.01	-1.62194		C30C11.4	5
177070_s_at	2725.42	1506.28	-1.80937		C30F8.2
190541_at	86.9217	37.9855	-2.28829		C30G12.2	22
182934_at	458.574	229.963	-1.99412		C30H7.2	2
186010_at	285.98	99.183	-2.88336		C32E8.11	5
175079_s_at	105.55	47.8521	-2.20576	ptr-2	C32E8.8	7
185188_at	58.84	110.012	1.86968		C32H11.13	21
184693_s_at	281.377	151.571	-1.8564		C32H11.8	14
188665_at	318.098	126.756	-2.50954		C33A11.1	1
187028_s_at	91.9746	56.3659	-1.63174		C33E10.10	0
192183_s_at	964.625	603.804	-1.59758	rsp-6	C33H5.12	18
188130_s_at	79.983	48.1481	-1.66119		C33H5.4	11
189321_at	642.837	246.971	-2.60289		C34C12.8
184907_at	390.595	187.716	-2.08078		C34D4.14	5
172336_x_at	56.5944	91.4591	1.61604		C34D4.5	0
187590_at	143.217	75.7608	-1.89038		C34E10.4	2
181680_s_at	118.979	70.7318	-1.68212		C34E11.3	1
177909_at	233.033	101.515	-2.29556	pqn-18	C34E7.1	6
178068_s_at	2563.46	1010.26	-2.53744		C34E7.4	1
184546_s_at	98.6974	161.572	1.63705		C34F11.8	15
191357_s_at	164.734	102.964	-1.59992	dsh-1	C34F11.9
193116_at	241.97	132.144	-1.83111		C34F6.10	1
184067_at	265.512	163.078	-1.62812		C34G6.1	5
183115_at	132.121	80.0931	-1.64959		C34H4.2	19
189780_at	138.744	75.0867	-1.84778	vav-1	C35B8.2	1
174194_at	70.5425	123.777	1.75465		C35C5.6	9
189163_at	384.212	747.143	1.94461		C36A4.2	21
186657_at	67.2582	37.5262	-1.7923	cle-1	C36B1.1	6
176626_at	664.699	420.575	-1.58045	mlc-1	C36E6.3
189594_at	268.927	153.324	-1.75398		C36F7.1	0
187928_at	361.415	204.426	-1.76795	pry-1	C37A5.9	1
190063_at	179.206	294.587	1.64384		C37C3.6	1
191332_at	477.338	221.719	-2.1529		C37E2.1	1
173897_at	173.184	266.63	1.53957	ceh-37	C37E2.5	1
192101_at	1104.3	543.066	-2.03346		C37H5.6	2
192644_at	750.626	266.236	-2.8194	hsp-6	C37H5.8	5
173035_s_at	66.4044	100.266	1.50993		C37H5.9	8
192015_s_at	1795.61	648.729	-2.76789	unc-60	C38C3.5	30
177499_at	179.319	86.8727	-2.06416		C38H2.2
181492_at	46.0388	74.442	1.61694		C39B5.5
173754_at	55.0426	99.73	1.81187	mls-2	C39E6.4	3
192404_at	377.401	794.434	2.10501		C39E9.2	15
179110_at	630.022	414.11	-1.52139		C39E9.8	8
190034_at	1823.59	646.401	-2.82115	rab-1	C39F7.4
191841_at	139.131	66.2817	-2.09909		C40C9.5	1
191691_at	382.939	602.455	1.57324		C40H1.5
175424_at	125.738	245.929	1.95589		C40H1.7
187144_at	83.3156	33.7732	-2.46691	ulp-4	C41C4.6	5
184246_s_at	311.884	148.365	-2.10214	eif-3.H	C41D11.2	41
185383_at	261.665	100.296	-2.60893		C41D11.3	5
188878_s_at	1538.6	998.641	-1.54069	apl-1	C42D8.8	1
186016_s_at	123.787	60.6869	-2.03976		C43E11.3	5
182287_at	256.528	160.136	-1.60194		C43H6.3	2
184032_at	192.732	110.713	-1.74083		C43H6.7	3
191281_s_at	628.605	413.036	-1.52191	mec-12	C44B11.3	1
192215_s_at	184.836	97.9457	-1.88713	ras-1	C44C11.1	15
185117_at	139.325	230.906	1.65732		C44E12.1
172062_x_at	88.3121	31.7367	-2.78265	twk-17	C44E12.3	6
190130_at	906.226	486.526	-1.86264		C44E4.4	20
193920_at	221.722	130.978	-1.69282	acy-3	C44F1.5	13
177921_at	128.882	61.725	-2.088		C44H4.4	5
193942_s_at	144.697	84.4973	-1.71244	tag-66	C45B11.1	11
190311_s_at	731.148	1195.56	1.63518	dhs-18	C45B11.3
180946_at	65.3805	138.867	2.12398		C45G7.3	15
181015_at	123.483	47.1805	-2.61724		C45G7.6	14
192026_at	2172.73	1347.02	-1.61299	col-14	C46A5.3	16
176782_s_at	131.622	235.586	1.78987		C46C11.2
190424_at	440.716	241.615	-1.82404	wnk-1	C46C2.1	5
192363_at	268.999	171.333	-1.57004		C46F4.2	1
187109_s_at	209.366	67.6541	-3.09466		C46H11.11	1
184254_at	731.972	430.093	-1.70189		C46H11.7	14
193057_s_at	1626.63	931.008	-1.74717	pbs-2	C47B2.4	20
193814_at	1159.51	642.039	-1.80598	eif-6	C47B2.5	20
191546_s_at	1087.65	696.256	-1.56215	trs-1	C47D12.6	20
182249_at	185.765	296.833	1.59789		C47D2.1	6
190679_s_at	197.235	131.315	-1.502		C47E12.2	7
179231_at	110.564	70.3598	-1.57141		C47G2.5	5
193238_s_at	246.628	102.855	-2.39782	egl-19	C48A7.1	1
189831_at	447.742	118.498	-3.77847		C48A7.2	30
188662_at	72.0402	116.148	1.61227	rom-2	C48B4.2	6
189574_s_at	157.803	94.7647	-1.66521	smg-1	C48B6.6	13
194094_s_at	320.054	200.689	-1.59478	ptp-1	C48D5.2	1
183956_at	1360.02	784.844	-1.73285		C48E7.1	6
182912_at	97.4882	58.8941	-1.65531	lpd-2	C48E7.3	2
179562_at	102.686	52.5403	-1.95442		C48G7.1	5
179454_at	136.646	219.662	1.60752		C49C3.8	6
192493_s_at	3046.5	1256.57	-2.42445	sams-1	C49F5.1	24
178797_at	201.051	333.218	1.65738		C49F5.7	8
192219_at	67.3939	39.1794	-1.72013		C49F8.2	1
184711_at	103.942	180.696	1.73843		C49G7.10	8
182712_at	111.95	249.102	2.22512		C49G7.4	19
189409_at	74.6865	120.443	1.61265		C49G7.8	19
192732_at	176.158	49.4828	-3.55998	ntl-4	C49H3.5	1
182804_at	148.159	91.9099	-1.612		C49H3.9	5
182077_at	66.9634	39.2035	-1.7081		C50A2.3	0
176091_s_at	1224.04	552.518	-2.21539	prp-8	C50C3.6	5
185770_at	135.983	89.9615	-1.51157	sop-2	C50E10.4	5
182728_at	66.3176	34.8129	-1.90497		C50F2.4	0
193656_s_at	3476.08	2182.36	-1.59281	fkb-5	C50F2.6	14
173209_s_at	160.021	312.7	1.95412		C50F4.1	8
183381_at	399.327	1573.36	3.94002		C50F7.5	8
193971_at	193.204	62.687	-3.08205	mpz-1	C52A11.4	1
176557_at	379.316	125.59	-3.02028		C52D10.11	6
184872_at	148.093	83.6382	-1.77063		C52D10.12	1
188472_s_at	266.754	86.8431	-3.07167	unc-104	C52E12.2	6
193293_at	3824.65	5889.82	1.53996	cpr-1	C52E4.1	8
180464_s_at	103.407	63.6526	-1.62456	cyl-1	C52E4.6
192776_at	629.993	383.196	-1.64405	hda-1	C53A5.3	11
186365_at	357.225	749.499	2.09811		C53C11.2	10
176917_at	200.695	87.6467	-2.28982		C53D5.1
188240_at	273.801	150.585	-1.81825		C54A12.1	14
174883_s_at	360.177	116.216	-3.0992	ben-1	C54C6.2	5
189015_at	136.163	84.5092	-1.61122		C54D1.2	8
191485_at	166.082	289.171	1.74114		C54D10.10	6
192218_at	509.366	325.592	-1.56443		C54G4.1	8
191292_s_at	1206.12	683.309	-1.76512	cyc-1	C54G4.8	23
188541_s_at	1391.72	887.808	-1.5676	sft-4	C54H2.5	30
178619_at	30.3743	80.9215	2.66414		C55A1.6	3
182464_s_at	448.395	200.304	-2.23857	dnj-7	C55B6.2
189918_s_at	275.765	125.838	-2.19143	aat-5	C55C2.5	6
184839_at	159.413	67.3173	-2.36809		C55F2.1	8
175097_at	421.43	634.948	1.50665		C56C10.11	2
184212_s_at	336.561	183.523	-1.83389		C56C10.3	1
187267_at	151.411	57.7479	-2.62192		C56G2.1	1
177120_s_at	333.248	212.764	-1.56628	nlp-15	CC4.2	6
176876_at	173.938	59.4116	-2.92768		CC8.2
179313_at	79.3867	43.0792	-1.84281		D1025.2	19
179480_at	55.5778	112.163	2.01813		D1025.3	13
174068_s_at	108.734	65.6116	-1.65723	rab-8	D1037.4	5
187222_at	262.867	162.057	-1.62207		D1044.1
174417_s_at	417.275	662.949	1.58876	pqn-25	D1044.3	9
192204_s_at	395.243	226.452	-1.74537		D1046.1	5
190714_at	367.654	207.319	-1.77337		D1081.8	2
176025_at	194.709	322.821	1.65797		D2007.1	8
192665_at	166.903	99.1356	-1.68358	rab-39	D2013.1	8
189798_s_at	188.001	110.023	-1.70873	eat-3	D2013.5	20
179636_at	424.121	201.592	-2.10386		D2013.6	2
189010_s_at	2405.44	1200.42	-2.00384	eif-3.F	D2013.7	2
188367_at	114.787	47.2768	-2.42798		D2021.8	1
190972_at	381.092	572.405	1.50201		D2023.4	2
187255_at	751.207	126.814	-5.92371	elo-3	D2024.3	13
178504_at	353.445	139.731	-2.52947	atx-2	D2045.1
194078_s_at	1589.56	671.462	-2.36731	pyr-1	D2085.1	1
193988_at	371.345	115.581	-3.21285		D2085.4	2
178891_at	85.7753	141.902	1.65434		D2089.3
193569_at	217.918	104.839	-2.0786	ptb-1	D2089.4	1
180032_at	368.759	160.869	-2.29229		D2092.4
180123_at	64.415	31.759	-2.02824		D2092.5	11
185220_s_at	85.9065	40.8009	-2.10551		D2096.11	11
183207_at	665.676	1189.96	1.7876		D2096.3	2
187176_s_at	1299.43	822.885	-1.57911		D2096.6
177113_at	862.196	470.166	-1.83381	pqn-26	DY3.5	14
176619_s_at	98.2333	35.3955	-2.77531	lin-44	E01A2.3
176113_at	807.383	529.171	-1.52575		E01A2.6
176120_s_at	129.147	200.185	1.55005		E01A2.7
177864_at	158.763	65.8343	-2.41155		E01G4.2	1
193477_s_at	568.023	274.52	-2.06915		E01G6.1	1
192005_at	168.025	304.64	1.81307	pkc-2	E01H11.1	38
179946_s_at	867.517	404.898	-2.14256		E02D9.1	1
190324_at	114.02	55.6535	-2.04874		E02H1.6	2
192979_at	184.112	94.7984	-1.94214	tag-172	E02H4.3	1
181022_s_at	157.295	92.7859	-1.69525		E02H9.3	19
193056_s_at	196.53	356.303	1.81297	mrp-3	E03G2.2	31
190139_s_at	244.265	762.196	3.12036		E03H4.10	17
181103_s_at	322.851	201.561	-1.60175	hoe-1	E04A4.4	2
187640_s_at	1495.7	805.107	-1.85776		E04D5.1	5
191847_s_at	441.246	233.189	-1.89223		E04F6.5	20
182486_at	66.8616	122.642	1.83427		E04F6.8	8
189340_at	391.987	261.031	-1.50169	mog-5	EEED8.5	5
180760_at	389.777	668.065	1.71397		EGAP4.1
178128_at	170.395	305.266	1.79152		F01D5.3	19
187798_s_at	82.0796	51.9479	-1.58004		F01F1.1	2
185988_at	152.444	87.6313	-1.73961	sur-7	F01G12.2	5
192923_s_at	1768.11	1176.53	-1.50281	let-2	F01G12.5
172790_x_at	381.693	635.561	1.66511		F02C12.5	21
191973_s_at	97.7547	63.7958	-1.53231	lin-28	F02E9.2
177564_at	104.323	30.0177	-3.47538		F02E9.9
190436_at	3714.85	2359.24	-1.5746	unc-15	F07A5.7	16
173917_at	250.378	399.86	1.59703	glo-4	F07C3.4	1
190092_at	193.33	105.202	-1.8377	aat-2	F07C3.7	24
180924_at	77.7232	143.235	1.84288		F07C4.6	17
183521_at	346.826	145.474	-2.38411		F07C6.4	11
194059_at	372.42	180.345	-2.06504		F08A8.2
193148_at	425.274	181.404	-2.34435	vhp-1	F08B1.1	1
183641_at	2462.21	3962.78	1.60944		F08B12.4	8
182060_at	78.3673	31.6002	-2.47996	dic-1	F08B4.1	11
189243_at	157.046	90.6011	-1.73338	adt-2	F08C6.1	16
193162_s_at	438.702	244.714	-1.79272		F08C6.2	5
193071_at	514.248	122.316	-4.20427		F08D12.1	5
180161_at	592.491	322.987	-1.83441	tag-123	F08F1.7	1
189344_s_at	556.097	134.485	-4.13502	ccp-14A5	F08F3.7
183676_s_at	164.807	75.5278	-2.18207		F08F8.5	0
179997_s_at	293.337	160.897	-1.82313		F09A5.4	1
190640_s_at	471.372	204.781	-2.30183	unc-115	F09B9.2	1
171932_x_at	208.586	562.057	2.6946		F09C8.1
189727_at	503.274	287.773	-1.74886		F09D1.1	5
186055_at	547.882	331.065	-1.65491	grd-10	F09D12.1	8
192650_at	503.984	325.367	-1.54897	dhs-25	F09E10.3	5
185165_s_at	141.005	78.7696	-1.79009		F09E5.10	5
192465_at	93.8307	233.698	2.49064		F09E8.5	15
189899_at	79.8239	26.1403	-3.05367	nas-14	F09E8.6	14
190996_at	449.459	687.186	1.52892		F09F3.6	6
183878_at	760.935	464.529	-1.63808		F09F7.3	2
190067_at	1181.46	530.086	-2.22881		F09F7.4
173490_s_at	740.371	1142.54	1.5432		F09F7.7	15
184195_at	368.684	209.012	-1.76394		F09G2.4	11
184089_s_at	767.48	378.9	-2.02555		F09G2.9	5
190431_at	80.3644	123.849	1.54109		F10B5.5	7
180576_at	93.3849	58.9008	-1.58546	mat-3	F10C5.1	2
181707_at	2201.65	1277.16	-1.72386		F10D11.6	14
181682_at	60.745	115.731	1.90519		F10D7.1	13
192151_at	1054.62	327.052	-3.22463	tsn-1	F10G7.2	5
180070_s_at	222.887	83.1811	-2.67954		F10G7.9	5
191638_s_at	271.743	156.065	-1.74122		F10G8.1	4
193740_at	1001.92	409.881	-2.44441	ncs-2	F10G8.5	5
193388_s_at	161.414	103.142	-1.56497		F10G8.8	1
192797_s_at	173.904	27.387	-6.34986	daf-12	F11A1.3	1
192919_s_at	398.188	214.384	-1.85736	kpc-1	F11A6.1
178635_at	140.204	56.5391	-2.47977		F11A6.2	6
179331_at	78.2775	29.6542	-2.63968		F11C1.1	1
182418_s_at	143.457	42.5472	-3.37171		F11C1.5	24
193001_s_at	143.044	59.0141	-2.4239	nhr-25	F11C1.6	1
173523_s_at	1864.12	656.029	-2.84151		F11C7.5	8
176883_at	102.926	54.9898	-1.87173		F11D5.1	1
184930_at	421.827	237.719	-1.77448	dnj-9	F11G11.7	9
175885_at	158.443	242.161	1.52838		F12E12.7
187965_s_at	97.8401	53.9246	-1.81439		F12F3.2	1
187788_at	175.085	91.7024	-1.90928	gei-10	F13C5.6	1
192791_s_at	148.16	35.6234	-4.15907	hbl-1	F13D11.2	1
192807_s_at	60.5198	95.9826	1.58597		F13D11.3	15
193849_at	718.251	1132.55	1.57681		F13D11.4	14
179714_at	123.683	236.139	1.90923		F13D12.3	8
172958_s_at	1148.66	706.901	-1.62492		F13D12.6	27
193967_at	504.444	150.147	-3.35967	gpb-1	F13D12.7	1
189895_at	554.66	100.029	-5.54499		F13H6.1	1
192089_s_at	702.375	408.663	-1.71872		F13H8.5	8
188584_s_at	454.526	265.275	-1.71341		F14B4.2	7
191795_s_at	700.728	330.086	-2.12287		F14B4.3	20
193526_s_at	906.579	556.526	-1.629	unc-97	F14D12.2	16
190178_s_at	43.6562	84.9592	1.9461		F14D12.5	6
192255_at	144.157	74.9431	-1.92355		F14D7.6	24
178799_at	46.1916	91.8137	1.98767		F14D7.7	8
179137_at	26.6728	196.427	7.36431		F14F8.8	3
176787_s_at	193.659	1490.45	7.69626		F14H12.3
192485_at	623.224	1450.53	2.32746		F15A4.6	8
193272_s_at	66.4334	668.81	10.0674	far-3	F15B9.1
179320_at	106.888	56.1705	-1.90293		F15B9.4	7
193521_s_at	361.625	236.294	-1.5304	sem-4	F15C11.1	6
177528_at	73.1654	25.4158	-2.87873		F15D3.6	5
189471_at	43.1352	71.8374	1.6654		F15D4.4	1
181326_at	1465.13	916.863	-1.59798		F15E6.2	14
190872_at	37.2838	66.8788	1.79378		F16B4.9	2
193797_at	379.272	920.541	2.42713		F16H6.1	27
181797_at	238.74	128.421	-1.85904		F17H10.1	8
183064_at	279.842	184.105	-1.52002		F17H10.2	15
191829_at	411.591	207.632	-1.98231		F18A11.2	1
189789_s_at	358.235	234.604	-1.52698	rme-8	F18C12.2	5
180778_at	478.248	285.493	-1.67517		F18C5.3	5
187751_s_at	332.253	214.436	-1.54943		F18E9.5	1
192252_at	187.389	99.5539	-1.88229		F18F11.4	8
182444_at	127.996	83.8256	-1.52693		F18G5.6	15
173881_at	572.042	889.893	1.55564	pab-2	F18H3.3	1
193858_s_at	100.915	63.8775	-1.57982	cdk-4	F18H3.5	12
185516_s_at	262.84	399.667	1.52057		F19B10.1	13
177833_s_at	348.283	218.531	-1.59374		F19B2.5
189152_s_at	439.379	235.792	-1.86342		F19B6.1
192727_at	132.033	57.7006	-2.28824	grk-1	F19C6.1	1
187139_s_at	109.355	62.7865	-1.7417		F19C6.2	1
184929_at	50.1843	84.3834	1.68147		F19G12.3	1
181821_at	143.182	250.816	1.75173		F20A1.6	0
189417_s_at	94.1677	40.4975	-2.32527		F20B10.2	1
192235_at	464.185	116.436	-3.9866	hpk-1	F20B6.8	1
178234_at	159.8	77.9968	-2.0488	pme-3	F20C5.1	11
189816_s_at	383.626	226.707	-1.69217	klp-11	F20C5.2	12
179233_at	633.509	378.796	-1.67243		F20D1.1	30
189429_at	220.953	126.647	-1.74464		F20D6.11	15
180693_at	438.772	237.326	-1.84882		F21A10.2	1
189679_at	141.038	75.1954	-1.87562		F21A3.3	16
186521_at	238.943	530.702	2.22104		F21C10.10
185902_at	704.145	225.335	-3.12487		F21C10.9	0
185628_at	316.032	140.158	-2.25482		F21D12.3	6
188441_at	149.668	1268.22	8.47352		F21F8.4	8
175043_s_at	266.235	495.171	1.8599	mrp-4	F21G4.2	11
193368_s_at	123.641	59.6746	-2.07192	ptc-2	F21H12.4	11
192249_at	315.119	162.258	-1.94208		F22A3.1	1
172400_x_at	5584.39	3589.49	-1.55576		F22A3.6	19
193722_at	82.7231	125.532	1.5175	evl-20	F22B5.1	2
190713_at	21.6189	550.382	25.4584	fip-1	F22B7.4
175860_s_at	83.9158	46.1275	-1.81921	dnj-10	F22B7.5	5
187282_at	1230.89	2100.08	1.70615		F22B7.9	15
191652_at	2430.38	1118.64	-2.17262		F22B8.6	5
181759_at	320.915	101.771	-3.15331		F22D3.2	12
179366_at	905.922	328.403	-2.75856		F22D6.2	4
190611_s_at	281.737	176.196	-1.599	prp-4	F22D6.5	11
190248_s_at	797.935	351.487	-2.27017	pgp-14	F22E10.3	21
189836_at	277.343	103.748	-2.67322		F22E10.5	24
180498_at	179.276	108.511	-1.65214		F22E12.3	0
180401_at	150.46	81.2675	-1.85141		F22F7.7	1
193895_at	37.4081	65.2844	1.74519	flp-1	F23B2.5	6
171733_x_at	248.2	81.091	-3.06076		F23F12.9	12
182789_at	25.7233	66.6255	2.59008		F25A2.1	0
192393_at	247.679	147.539	-1.67873		F25B4.6	44
187277_s_at	118.221	78.2343	-1.51111		F25B5.2	7
190413_at	509.972	226.181	-2.25471	nrs-2	F25G6.6	29
189616_at	208.834	100.14	-2.08542		F25G6.7	14
177571_at	559.907	356.771	-1.56937	ubc-25	F25H2.8	11
193411_s_at	246.292	66.4601	-3.70586	tag-15	F25H5.1	8
189418_s_at	1484.7	928.35	-1.59929		F25H5.3
188104_s_at	1124.88	566.085	-1.98712	dur-1	F25H8.5	16
179254_at	703.115	461.944	-1.52208		F25H8.6	14
189781_at	206.556	39.6936	-5.20375		F26A3.2	2
189852_at	495.383	240.087	-2.06335		F26B1.2	11
185536_at	167.988	71.3889	-2.35314		F26D10.11	1
186878_at	240.702	116.421	-2.06752	let-413	F26D11.11	0
189782_s_at	436.478	182.098	-2.39694	sur-6	F26E4.1	5
187863_s_at	271.901	156.777	-1.73432		F26F12.3	15
184111_s_at	165.86	53.6868	-3.0894	nhl-2	F26F4.7	5
181202_at	45.7703	76.7525	1.67691		F26G1.2	15
187818_s_at	1224.8	568.632	-2.15395		F26H11.2	5
189793_at	971.142	534.403	-1.81725	rab-5	F26H9.6	1
179424_at	1259.24	2362.76	1.87634	spp-18	F27C8.4	8
193653_s_at	1209.72	655.424	-1.8457		F27D9.5	1
186832_at	513.274	849.703	1.65546		F27E5.1	8
193258_at	1662.42	921.596	-1.80385	phg-1	F27E5.4	14
193230_at	302.19	121.683	-2.48342	egl-44	F28B12.2	1
193242_at	212.012	87.6917	-2.4177		F28C1.3
193588_s_at	126.422	250.51	1.98154		F28D1.5	8
191612_at	586.344	355.552	-1.64911		F28D1.9	9
171871_x_at	291.273	173.268	-1.68105	rsr-1	F28D9.1	5
189221_at	33.3351	126.357	3.7905		F28G4.1	8
175645_s_at	213.321	69.6878	-3.06109	ars-2	F28H1.3	5
191889_s_at	289.426	160.382	-1.8046		F29B9.6	18
182443_at	349.094	110.915	-3.14739		F29B9.8	16
189103_at	195.653	125.947	-1.55345	daf-1	F29C4.1	5
181768_s_at	364.502	234.033	-1.55748		F29C4.6	2
193872_s_at	1813.56	981.145	-1.84841	lrp-1	F29D11.1	1
192851_s_at	1132.42	373.352	-3.03312	gsp-1	F29F11.6	5
172455_x_at	301.218	87.3629	-3.4479		F29G6.3	27
193000_s_at	193.174	120.425	-1.6041		F30F8.9
191217_s_at	1360.51	746.822	-1.82173		F30H5.3	1
179595_at	200.433	102.681	-1.952		F31D4.1	2
179551_at	484.912	152.801	-3.17348		F31D4.2	5
177413_s_at	331.451	183.096	-1.81025	snt-1	F31E8.2	6
188649_at	41.8753	66.7239	1.5934		F31E8.6	5
186215_at	104.939	50.4967	-2.07813		F31F4.15	24
181824_s_at	725.381	411.606	-1.76232		F32A11.1
193686_at	387.505	187.931	-2.06195	moe-3	F32A11.6	1
193818_s_at	197.731	298.818	1.51124	aex-5	F32A7.6	1
182997_s_at	274.768	143.759	-1.91132		F32B5.7	1
188264_at	90.8219	48.0025	-1.89203		F32D1.1	2
178886_at	259.721	116.335	-2.23253		F32D8.3	8
186283_at	183.688	96.2106	-1.90923		F32E10.1	5
175699_s_at	407.966	82.3657	-4.95311	ima-3	F32E10.4
189768_at	2933.39	1437.2	-2.04104		F32H2.5	1
192242_at	88.5325	139.037	1.57046		F32H2.6	0
187662_at	126.566	216.448	1.71017		F32H5.3	8
192145_s_at	1368.84	854.859	-1.60125	cey-1	F33A8.3	1
179223_at	111.16	53.3552	-2.0834		F33C8.4	8
186997_at	674.745	367.51	-1.83599		F33D11.11	20
188589_at	1214.28	710.281	-1.70958	col-54	F33D11.3	14
193703_s_at	186.974	94.3969	-1.98072	itr-1	F33D4.2	27
178414_s_at	67.9157	41.6914	-1.62901	dog-1	F33H2.1	5
175556_at	446.898	692.034	1.54853		F34H10.3
180320_at	236.826	366.75	1.54861		F35A5.2	6
179689_at	168.011	97.3874	-1.72518		F35A5.4	9
191198_at	278.05	173.202	-1.60535		F35B12.4	1
191213_at	158.613	274.679	1.73176		F35B12.6	6
181939_at	222.664	135.918	-1.63823		F35C11.4	24
194063_at	178.742	288.254	1.61269		F35C5.7	21
187566_at	87.5145	57.3437	-1.52614	syn-1	F35C8.4	2
176622_s_at	244.061	155.553	-1.56898	fem-1	F35D6.1	30
179695_at	128.662	193.071	1.50061		F35E12.5
180204_at	150.054	83.8232	-1.79012		F35E12.9	31
193690_at	296.36	103.583	-2.8611		F35G2.1	11
193464_s_at	376.582	235.593	-1.59844	phy-2	F35G2.4	14
189083_at	327.354	179.039	-1.8284	exc-7	F35H8.5	1
188988_at	252.427	148.903	-1.69525		F36A2.9	11
177958_at	124.651	201.948	1.62012		F36D1.7
178614_s_at	56.8206	95.2707	1.67669		F36F2.2	15
188815_at	246.888	108.134	-2.28316	tag-144	F36H1.2	5
172367_x_at	117.336	68.7039	-1.70785		F36H5.1	38
187350_at	182.785	108.541	-1.68402	rbf-1	F37A4.7	1
190957_at	55.9157	140.624	2.51492	gst-15	F37B1.4	6
184083_s_at	227.319	144.286	-1.57548		F37B12.3	2
190404_s_at	1079.92	573.865	-1.88183		F37B4.7	19
187019_at	66.7688	107.596	1.61148		F37C12.10	15
186199_at	554.355	341.303	-1.62423		F37C12.7	5
177742_at	40.7416	73.1493	1.79544		F37D6.3	1
177522_at	218.196	136.892	-1.59393	tag-68	F37D6.6	6
185454_s_at	313.091	128.1	-2.44411		F38A5.10	16
190164_s_at	578.593	258.179	-2.24105	dnj-11	F38A5.13	18
172595_x_at	355.193	173.122	-2.05169		F38A5.5	8
193963_s_at	259.553	141.858	-1.82967	pha-4	F38A6.1	9
183824_s_at	1764.94	1002.57	-1.76041	hif-1	F38A6.3	1
193636_s_at	388.843	166.552	-2.33466		F38B7.1	1
192750_at	545.306	226.779	-2.40457	let-92	F38H4.9	9
192824_s_at	1810.18	950.875	-1.9037	dnj-12	F39B2.10
187532_s_at	308.606	188.442	-1.63767		F39B2.11	11
190755_at	286.542	179.247	-1.59859	tsp-14	F39C12.3	14
193370_s_at	113.081	54.0355	-2.09271	tlf-1	F39H11.2	9
191348_s_at	300.217	183.498	-1.63608	slt-1	F40E10.4	1
180597_at	745.864	389.886	-1.91303		F40E10.6	1
182509_at	243.185	133.627	-1.81987		F40F11.2	5
186348_s_at	98.3555	51.2715	-1.91833		F40F12.5
173727_s_at	1621.17	2652.67	1.63627		F40F4.6	27
190650_at	430.915	281.044	-1.53327		F40F9.7	9
183516_at	335.333	203.513	-1.64772		F40G9.2	2
191780_s_at	1140.15	695.465	-1.63941	ubc-20	F40G9.3	5
183311_at	240.326	140.704	-1.70803		F40H3.1	6
175918_at	442.025	680.034	1.53845		F41B4.3	26
176601_at	270.059	134.606	-2.0063	unc-6	F41C6.1	1
183649_at	210.54	122.11	-1.72418	wrk-1	F41D9.3	5
181426_at	102.906	183.431	1.78251		F41E6.1	3
180979_at	2003.18	1219.18	-1.64305	grd-5	F41E6.2	8
180300_at	488.149	318.175	-1.53422		F41E6.4	5
178094_at	316.496	523.153	1.65295		F41E7.7	6
187808_s_at	236.024	118.013	-1.99997	nfm-1	F42A10.2	6
172737_x_at	178.054	61.3271	-2.90335	efk-1	F42A10.4	15
185571_at	1034.86	506.2	-2.04437		F42A10.5	20
192043_s_at	1582.49	952.538	-1.66134	hrp-1	F42A6.7	5
181906_at	206.765	121.295	-1.70464		F42A6.9	1
189297_at	48.3786	77.1585	1.59489		F42A9.5	8
182143_s_at	1193.99	741.945	-1.60928	grl-4	F42C5.7	1
185122_s_at	176.139	74.7678	-2.35581		F42E11.2	9
192073_s_at	1930.47	947.97	-2.03642	zyx-1	F42G4.3	16
183553_s_at	108.781	65.377	-1.66391		F42G9.6	5
176229_at	88.6404	56.2355	-1.57624		F42H10.3	14
193948_s_at	230.626	111.121	-2.07544	mpk-1	F43C1.2	5
186541_at	74.0538	42.9333	-1.72486		F43C1.5
186263_at	71.3503	119.446	1.67408		F43C11.7
191855_at	497.578	239.48	-2.07775		F43G9.3
173983_at	514.624	848.787	1.64933	cpn-1	F43G9.9	7
174758_at	89.4199	252.318	2.82172	tag-153	F44A2.1	11
184050_s_at	408.332	270.185	-1.51131		F44A2.5	1
176657_at	362.391	201.561	-1.79792	cit-1.2	F44B9.3	1
176655_at	175.958	105.395	-1.66951	cit-1.1	F44B9.4	5
193958_at	4111.73	7410.49	1.80228	cpr-4	F44C4.3
190862_at	131.77	38.4198	-3.42975		F44E2.2	9
188308_s_at	193.597	93.2259	-2.07665		F44E2.3	2
187935_s_at	334.476	629.782	1.88289	ptr-8	F44F4.4	8
189178_at	2512.18	919.344	-2.73258		F44G3.2	9
186801_s_at	323.656	910.51	2.8132		F45D11.15
172593_x_at	60.6795	138.262	2.27857		F45D11.2
173550_at	966.251	1656.38	1.71423		F45D3.4	8
188599_s_at	104.793	59.8869	-1.74986	cul-4	F45E12.3	5
186229_at	86.283	46.063	-1.87315		F45F2.10	2
192577_at	156.984	95.5513	-1.64292	nas-1	F45G2.1
193933_at	134.607	46.5005	-2.89475		F45G2.2	1
194108_s_at	1042.34	659.245	-1.58111		F45H10.3	23
192461_at	120.824	48.6291	-2.48461	prk-2	F45H7.4	6
172189_at	34.4224	64.9923	1.88808		F46A8.7	15
172224_x_at	60.9951	97.266	1.59465		F46A8.9	4
192507_at	508.871	233.36	-2.18062	mec-8	F46A9.6	1
190308_at	441.201	266.315	-1.65669		F46B6.6	2
188078_at	93.4954	246.971	2.64153		F46B6.8	8
193940_s_at	335.44	205.659	-1.63105	pek-1	F46C3.1	1
186528_s_at	467.547	1315.21	2.81301		F46E10.11	19
191000_s_at	2761.85	1684.34	-1.63972	dpy-11	F46E10.9	2
184462_at	392.402	591.611	1.50766		F46F11.7	2
189608_at	1250.18	287.158	-4.35362	kin-20	F46F2.2	1
178165_at	101.931	168.824	1.65626		F46F3.3	0
192159_at	400.253	218.812	-1.82921		F46F6.2	13
180985_s_at	336.814	220.121	-1.53013		F46G10.2	25
189788_at	310.137	154.041	-2.01333	dgk-2	F46H6.2	1
174627_at	270.074	451.781	1.6728		F47A4.5	1
180523_at	363.69	596.832	1.64105		F47B10.5	8
187796_at	375.405	207.837	-1.80625		F47B7.2	1
188050_at	73.316	118.363	1.61442	sss-2	F47B8.11	4
189434_s_at	567.163	334.925	-1.69341	hmg-1.2	F47D12.4	5
188304_at	548.276	292.179	-1.87651	smd-1	F47G4.7	24
185172_s_at	316.673	158.751	-1.99478	chi-2	F48A11.1	1
184905_at	92.2415	54.5169	-1.69198		F48A11.4	2
192170_s_at	218.898	141.381	-1.54828		F48E8.3	2
183021_at	122.807	64.3616	-1.90808		F48G7.4	6
194107_at	327.636	174.345	-1.87924	src-2	F49B2.5	1
180615_at	250.028	427.549	1.71001		F49C12.6	6
180945_s_at	87.6014	144.511	1.64965		F49C12.7	8
185482_at	255.55	114.963	-2.22289		F49D11.1	11
185390_at	50.3507	89.2538	1.77264		F49D11.6	12
184379_at	370.19	213.917	-1.73053		F49D11.9	7
185933_at	324.72	145.805	-2.22708		F49E10.2	14
174356_at	78.0704	124.002	1.58833	ctbp-1	F49E10.5	1
192799_s_at	442.235	165.797	-2.66732	mbk-2	F49E11.1	5
192737_at	668.489	1086.84	1.62581		F49E11.10	8
180309_s_at	496.603	165.557	-2.99959		F49E2.5
180727_at	158.556	390.737	2.46436		F49F1.5	19
181132_s_at	52.2417	83.4622	1.59762		F49F1.7
192071_at	219.617	121.438	-1.80846	lsy-2	F49H12.1
175700_s_at	814.396	410.347	-1.98465		F52B5.1	1
193167_s_at	181.268	72.928	-2.48558	pqe-1	F52C9.8	2
182630_at	181.134	113.456	-1.59651		F52D10.2	5
180450_at	1666.83	2597.41	1.5583		F52E1.5	8
191287_at	53.2969	94.2183	1.7678		F52E1.8	6
180911_at	197.694	98.4442	-2.00819		F52E1.9	16
180261_s_at	355.534	767.473	2.15865		F52E4.5	14
192907_at	98.2422	59.1033	-1.66221		F52H3.2	11
182603_at	254.611	103.522	-2.45948	pqn-41	F53A3.4	5
180612_s_at	659.714	1608.97	2.43889		F53A9.8	8
187402_at	403.732	654.503	1.62114		F53A9.9	6
193327_at	3430.63	1965.45	-1.74547		F53B1.4	14
192206_at	135.379	49.4534	-2.73751		F53B1.8	13
179252_at	91.6652	50.7719	-1.80543	ham-1	F53B2.6	1
182840_at	343.155	170.722	-2.01002		F53B3.5	12
182270_at	308.088	196.924	-1.5645		F53C11.4	9
193157_at	246.674	143.988	-1.71315		F53C11.7	2
192088_s_at	626.636	396.457	-1.58059		F53C3.13	2
185695_s_at	300.506	163.014	-1.84344		F53E10.6
192885_s_at	246.564	112.032	-2.20085		F53E4.1
190284_s_at	706.097	406.606	-1.73656	unc-108	F53F10.4	2
190127_at	1944.29	781.776	-2.48702	rab-11.1	F53G12.1
173648_s_at	219.54	121.518	-1.80665	tsr-1	F53G2.6	2
181174_at	493.174	165.925	-2.97227	mnat-1	F53G2.7	5
188666_at	127.13	69.4603	-1.83025		F53H4.5	14
175916_at	105.084	42.2789	-2.48551		F54A3.3
184672_at	62.598	37.3139	-1.6776	shc-1	F54A5.3
193915_s_at	420.397	174.318	-2.41166		F54B3.3	20
181040_at	44.8286	70.8683	1.58087		F54C1.6	10
188936_at	126.294	40.266	-3.1365		F54C8.5	11
172583_x_at	44.961	68.6004	1.52577		F54D10.2	15
184331_at	112.089	61.1346	-1.83348		F54D11.2	5
188802_at	1330.46	784.631	-1.69564	dnj-13	F54D5.8	5
172891_x_at	1032.68	423.999	-2.43558	his-58	F54E12.4	28
179937_s_at	345.081	156.978	-2.19828		F54E2.3	1
190832_at	165.028	82.0321	-2.01176	rbc-1	F54E4.1	1
192997_s_at	422.638	237.629	-1.77857		F54F2.1	1
176608_s_at	695.473	442.284	-1.57246	zfp-1	F54F2.2	5
187518_s_at	332.618	193.548	-1.71853	prx-19	F54F2.8	20
188241_at	341.797	203.332	-1.68098	ppk-1	F55A12.3	5
187849_at	1590.44	972.722	-1.63504	pqn-44	F55A12.9	1
182243_at	157.698	67.1361	-2.34893		F55A3.1	9
181577_at	207.983	72.1096	-2.88426		F55A4.2	1
190079_at	138.609	76.4478	-1.81312	egl-18	F55A8.1	5
192802_s_at	384.935	148.746	-2.58786	egl-4	F55A8.2	1
193107_s_at	229.083	107.338	-2.13422	sel-10	F55B12.3	11
187860_s_at	646.655	278.674	-2.32047		F55C12.1	1
186050_s_at	342.033	153.475	-2.22859	unc-73	F55C7.7	1
189534_at	477.847	742.394	1.55362		F55F3.2	8
187398_s_at	346.901	195.443	-1.77495		F55F8.3	0
187342_s_at	242.611	124.316	-1.95157		F55F8.5	2
181101_at	71.42	39.2927	-1.81764		F55F8.9	11
172702_x_at	357.152	188.415	-1.89556	his-62	F55G1.3	32
183624_at	33.4824	75.7895	2.26356		F55G11.5	8
188360_at	747.257	237.853	-3.14168	clu-1	F55H2.6	5
174419_s_at	83.3081	162.142	1.9463		F56A11.4	10
179505_at	180.231	52.0612	-3.46191		F56A8.1	0
187616_s_at	1163.1	528.71	-2.19989		F56A8.3	1
181870_at	1074.46	1752.4	1.63096	col-103	F56B3.1	16
183436_at	164.734	83.6086	-1.9703	ech-5	F56B3.5
191550_at	81.8006	139.231	1.70208		F56B3.7	0
190410_s_at	181.411	94.7899	-1.91382	uvt-5	F56B6.4	6
176747_s_at	397.102	241.686	-1.64305	gsp-2	F56C9.1	1
187568_at	277.03	172.296	-1.60787		F56D1.3	20
190694_s_at	313.993	169.841	-1.84875	alh-6	F56D12.1	5
186328_at	907.751	207.522	-4.37425	vig-1	F56D12.5
183941_s_at	1513.73	723.802	-2.09137		F56D3.1	14
178672_s_at	186.63	50.3739	-3.70489		F56D5.4	5
176743_s_at	241.739	403.871	1.67069	clec-68	F56D6.1	8
181565_at	224.088	543.908	2.42721		F56D6.2	8
183834_at	154.507	73.3505	-2.10642		F56F12.1
191679_s_at	215.988	74.8578	-2.88531	opt-3	F56F4.5
182424_at	110.024	60.526	-1.81779		F56H1.5	2
172271_x_at	1595	2597.51	1.62853		F56H9.2	15
188628_at	212.585	121.913	-1.74375		F57A8.1	1
178804_at	127.094	199.632	1.57074		F57B1.5	8
185841_s_at	673.87	296.782	-2.27059		F57B10.1
190052_at	236.021	88.8996	-2.65492	tre-1	F57B10.7
192061_at	302.333	160.075	-1.88869		F57B7.2	14
183957_s_at	225.096	59.7029	-3.77026	ntl-1	F57B9.2	5
173597_s_at	66.6995	40.2399	-1.65755		F57B9.7	11
190774_s_at	658.825	316.962	-2.07856	sdn-1	F57C7.3	1
194116_s_at	177.876	63.9158	-2.78297	pkc-1	F57F5.5	2
180157_at	460.591	128.421	-3.58657		F57G12.1	1
178443_s_at	194.318	26.9119	-7.22051		F57G4.5
192180_s_at	370.524	147.524	-2.51162	ubc-7	F58A4.10	18
188593_at	599.257	298.127	-2.01007	gei-13	F58A4.11	1
192781_s_at	521.742	229.781	-2.27061	hlh-11	F58A4.7	6
181655_at	304.215	169.079	-1.79925	nas-29	F58A6.4	14
191555_s_at	1197.52	763.704	-1.56804	mrs-1	F58B3.5	5
177517_at	338.508	99.3694	-3.40656	hrp-2	F58D5.1
177438_at	158.076	249.024	1.57534		F58D5.2
192162_at	70.2341	41.6272	-1.68722		F58G11.2	13
181912_at	169.187	107.095	-1.57978		F58H10.1	6
192362_at	189.262	80.3123	-2.35658	kin-29	F58H12.1	1
173491_s_at	234.267	375.757	1.60397		F58H7.2	1
179177_at	68.9626	36.5753	-1.8855		F59A2.6	2
183698_at	193.088	92.6496	-2.08407		F59A3.3	2
182282_s_at	189.182	65.1293	-2.90472		F59A3.6	8
183263_s_at	114.585	59.5705	-1.92351		F59B1.8	24
186989_at	142.174	80.6694	-1.76243		F59E11.12	31
185185_at	36.9922	60.6742	1.64019		F59E11.7	15
172579_x_at	208.499	110.793	-1.88187		F59E12.6	5
187897_s_at	185.126	106.526	-1.73784	syd-2	F59F5.6	1
193065_at	226.132	118.173	-1.91356	vps-35	F59G1.3	2
193101_s_at	158.012	48.1899	-3.27895	ptp-2	F59G1.5	5
175726_s_at	662.132	1492.05	2.2534	nhr-3	H01A20.1	1
182731_s_at	195.961	106.774	-1.83529		H03A11.1	1
185947_at	42.7879	67.7797	1.58408		H04J21.1	4
184970_s_at	189.529	75.6558	-2.50514		H05C05.2	5
189414_at	90.1146	48.5825	-1.85488	frm-3	H05G16.1	1
172617_x_at	208.398	49.4589	-4.21357		H06I04.3
184836_at	263.969	153.07	-1.72451		H10D18.1
173083_s_at	927.3	331.344	-2.7986		H10E21.4
185765_at	304.583	136.044	-2.23886		H11E01.3	1
182398_s_at	142.879	84.8259	-1.68438		H12D21.8	1
180800_at	320.75	140.952	-2.2756	gob-1	H13N06.3	1
185315_at	203.134	82.8456	-2.45196	kcc-3	H16O14.1
175454_at	149.226	245.61	1.6459		H18N23.2
177186_s_at	543.916	323.666	-1.68049	let-805	H19M22.2	1
188528_at	190.769	125.778	-1.51671		H19M22.3	1
189573_s_at	899.676	539.863	-1.66649		H19N07.1	20
180299_s_at	429.92	233.048	-1.84477		H19N07.4	2
186299_at	232.945	69.615	-3.34619		H20E11.2	3
186143_at	223.159	109.347	-2.04084		H20E11.3	19
173819_s_at	692.758	412.975	-1.67748	scd-1	H20J18.1	1
185427_s_at	357.91	188.855	-1.89516	sms-1	H21P03.3	5
190111_s_at	176.088	301.95	1.71477		H22K11.2	8
188748_s_at	124.166	54.3334	-2.28526		H25P06.1
193890_s_at	166.78	88.5683	-1.88307	cdk-9	H25P06.2
194122_at	596.556	209.682	-2.84504	nhr-97	H27C11.1	1
190208_at	709.571	330.955	-2.14401		H28G03.1	2
191657_s_at	425.222	84.7633	-5.01657	eat-20	H30A04.1	1
179787_at	197.418	102.372	-1.92843		H36L18.2	6
183240_s_at	510.339	290.201	-1.75857		H37A05.1	25
184712_s_at	232.88	134.899	-1.72633		H38K22.2	5
172832_x_at	274.455	176.553	-1.55451	gly-6	H38K22.5	1
193955_s_at	407.956	155.806	-2.61837	par-1	H39E23.1
175826_s_at	203.803	107.596	-1.89415	pdk-1	H42K12.1	5
177373_s_at	118.342	55.927	-2.11601		JC8.11	0
187124_s_at	194.919	108.228	-1.801		K01A2.11
191871_s_at	182.937	301.473	1.64796		K01D12.11	5
183379_at	1007.97	397.613	-2.53505		K01D12.9	14
192852_s_at	221.753	134.687	-1.64643		K01G5.1	11
189729_s_at	4006.26	2651.4	-1.511	ran-1	K01G5.4	18
193161_at	3029.12	1974.42	-1.53419		K01G5.5	20
189157_at	269.741	118.678	-2.27288	gfi-2	K02A11.1	5
175618_s_at	1131.43	553.302	-2.04487	eca-39	K02A4.1
172962_at	99.5941	57.2606	-1.73931	gpc-1	K02A4.2	6
193122_at	229.073	127.705	-1.79377		K02C4.3	7
189812_s_at	47.9563	76.5279	1.59578	col-101	K02D7.3
174389_s_at	348.673	219.318	-1.5898		K02E10.4	1
177832_at	197.635	100.796	-1.96075		K02E2.8
181230_at	1726.61	860.631	-2.00622		K02F3.4	1
186471_at	213.537	102.826	-2.07669	hyl-2	K02G10.6	1
178089_at	263.846	142.543	-1.85099		K03B8.6	16
178380_at	69.4629	116.872	1.68251		K03B8.8	24
188781_at	162.08	63.2406	-2.56291	fkh-9	K03C7.2	6
181873_at	206.023	125.387	-1.64309		K04B12.2	13
173684_s_at	656.516	389.185	-1.6869		K04C2.3	11
172869_x_at	629.716	330.166	-1.90727	bli-4	K04F10.4
185937_at	410.534	244.965	-1.67589		K04F10.7	5
193733_at	65.9021	42.4283	-1.55326	irk-3	K04G11.5	6
190990_at	222.836	143.582	-1.55198		K04G2.2	11
188684_s_at	70.4248	39.1863	-1.79718	rnp-7	K04G7.10	5
190901_s_at	1654.25	832.886	-1.98616		K04H4.2	14
184026_at	507.857	249.801	-2.03305	pes-22	K05B2.5	27
182468_s_at	241.915	137.842	-1.75502		K05F1.6	6
189796_s_at	427.315	255.701	-1.67115	cah-3	K05G3.3	19
192808_at	100.798	49.3025	-2.04449		K06A4.5	24
179974_at	84.6173	54.1289	-1.56325		K06A5.1	7
190107_at	81.9381	37.243	-2.20009	cdc-25.1	K06A5.7	7
172070_x_at	245.659	155.776	-1.577		K06A9.1	5
173103_s_at	166.984	270.379	1.61919		K07B1.4	2
182900_at	321.297	178.673	-1.79824		K07B1.5	11
173277_at	1028.86	235.041	-4.37735		K07B1.8
189765_at	92.9181	36.8669	-2.52037		K07C5.8	5
188150_s_at	969.316	504.587	-1.92101	rpn-11	K07D4.3	20
188105_s_at	1511.77	778.032	-1.94306	mup-4	K07D8.1	16
183392_at	136.312	70.7377	-1.92701		K07E3.1	5
187806_s_at	590.905	899.023	1.52144		K07E3.4	8
187544_at	170.026	96.9041	-1.75458		K07E3.7	1
192289_at	303.682	82.772	-3.66889	tag-59	K08B12.1	14
185876_at	126.027	73.5901	-1.71256		K08B12.2	1
192290_s_at	266.205	90.1722	-2.95218	tag-59	K08B12.5	5
192000_s_at	269.415	105.462	-2.55462	lag-1	K08B4.1	11
191759_at	37.964	205.824	5.42155	fmo-2	K08C7.5	8
178425_at	143.015	89.8215	-1.59221		K08D8.6	19
194139_s_at	391.201	256.212	-1.52687	cyk-4	K08E3.6	11
189725_at	466.085	225.214	-2.06952	nac-3	K08E5.2	6
173452_s_at	65.3078	38.9909	-1.67495	rde-1	K08H10.7	11
189715_s_at	172.085	68.2323	-2.52205	rab-14	K09A9.2	1
172957_s_at	70.2689	38.6109	-1.81992		K09A9.6	16
180517_at	139.562	63.6385	-2.19305		K09B11.9	5
184107_at	77.5488	233.763	3.01439		K09D9.1	25
189304_at	367.774	605.096	1.64529		K09D9.2	19
178332_s_at	104.571	332.678	3.18135		K09E4.4	6
182339_at	159.554	283.127	1.77449		K09H9.5
173689_s_at	186.412	89.2385	-2.08892	lpd-6	K09H9.6	20
190894_at	237.905	81.3717	-2.92368	lin-23	K10B2.1	5
175687_at	201.76	129.096	-1.56286	mai-1	K10B3.9	15
191853_at	289.551	172.471	-1.67884		K10C3.2	5
178257_at	103.915	39.9245	-2.60278		K10C3.4	11
182476_at	100.354	39.9867	-2.50967		K10D2.2	7
179905_at	124.106	45.4449	-2.73091		K10D2.3	2
190383_s_at	641.995	426.045	-1.50687	emb-8	K10D2.6	2
187430_at	66.8757	109.25	1.63363		K10D2.7
192656_s_at	213.636	113.692	-1.87907		K10G9.1	1
190098_s_at	193.612	78.9529	-2.45224	unc-70	K11C4.3	1
AFFX-r2-11687-5_s_at	87.0555	33.2851	-2.61545	unc-68	K11C4.5	1
190271_at	105.582	171.668	1.62593	cwp-4	K11D12.1	6
189736_s_at	1332.67	646.532	-2.06126		K11D12.4	21
190136_at	108	171.622	1.5891		K11D12.9	0
191284_at	1164.09	2506.75	2.15339		K11D2.2	8
188971_s_at	3039.85	1453.43	-2.0915	sca-1	K11D9.2	1
175821_s_at	1205.9	463.537	-2.60152	unc-43	K11E8.1	1
192272_at	187.297	110.379	-1.69685	egl-46	K11G9.4	12
173495_at	42.6871	65.486	1.53409		K11G9.5	6
172744_at	30.1415	98.2918	3.26101	mtl-1	K11G9.6	15
192057_at	185.512	59.9723	-3.09329		K11H3.3	9
192185_at	72.3724	24.5328	-2.95002	vab-8	K12F2.2	6
190978_at	851.368	1643.77	1.93074		K12G11.3	8
190890_s_at	179.456	119.327	-1.5039	tra-3	LLC1.1	5
191848_at	878.894	409.503	-2.14625		LLC1.3
185637_at	143.484	61.7082	-2.3252		M01B12.5	1
176728_s_at	458.691	168.943	-2.71506	scm-1	M01D7.2
193593_s_at	833.747	123.115	-6.77209	egl-30	M01D7.7	1
188534_s_at	549.263	276.965	-1.98315	tag-163	M01E11.7	1
178321_at	117.472	58.3316	-2.01387		M01E5.3	2
189853_s_at	315.579	55.4032	-5.69605	top-1	M01E5.5	5
180350_s_at	21.0735	77.3401	3.67001		M01G12.5	0
183578_at	428.214	230.178	-1.86036		M01G5.3
178232_at	124.095	66.9758	-1.85284		M02B1.2	6
178747_at	618.637	398.757	-1.55141		M02B1.3	7
174060_at	267.714	464.835	1.73631		M02E1.2
189891_at	773.615	339.735	-2.27711		M02G9.1	14
176004_at	159.46	88.2716	-1.80647		M02H5.4
176002_at	98.8468	194.331	1.96598		M02H5.8
193384_at	305.691	173.17	-1.76527	vab-1	M03A1.1	5
181251_at	284.503	183.443	-1.55091		M03A1.6	5
193744_s_at	132.598	59.2805	-2.23679		M03C11.5	2
188471_at	65.2306	34.059	-1.91523		M03C11.8	5
172447_at	107.259	201.027	1.87422		M03D4.3	1
191825_at	98.7807	33.527	-2.9463		M03E7.4	7
184106_at	244.166	379.963	1.55617		M03F8.1	14
183424_at	154.595	57.7079	-2.67893	pst-1	M03F8.2	2
185893_s_at	498.632	302.789	-1.6468	tag-260	M04G12.1	1
190491_at	353.756	219.603	-1.61089		M04G12.4	1
189093_at	185.119	97.5281	-1.89811		M106.4	5
191437_at	147.883	85.2235	-1.73524	ifg-1	M110.4	5
190192_s_at	272.81	130.757	-2.08638	dab-1	M110.5	5
177257_at	1550.38	635.111	-2.44111		M162.2	19
177250_at	80.0131	128.193	1.60215		M162.5	6
193709_at	942.283	532.359	-1.77001	aly-3	M18.7	2
189099_at	745.795	1159.33	1.55449	col-77	M195.1	16
177219_at	162.644	103.172	-1.57644		M28.8	8
177375_at	2577.4	1507.38	-1.70986		M60.2
177279_at	1333.25	2153.41	1.61516		M60.4	0
173782_at	39.398	87.2452	2.21446	kqt-2	M60.5	27
194131_s_at	68.9602	39.5456	-1.74381	abl-1	M79.1	1
174202_at	736.927	1201.5	1.63041	flp-19	M79.4	6
187934_at	304.956	141.323	-2.15786		M88.5	5
173339_at	30.1595	92.3338	3.06151		MTCE.23
172008_x_at	503.835	2924.63	5.80472		MTCE.35
189628_at	1552.71	979.009	-1.586	cah-4	R01E6.3
182635_at	86.4431	39.0779	-2.21207		R01H10.7	5
190006_at	282.86	55.0935	-5.13419		R02E12.2	1
185334_s_at	4541.01	2744.03	-1.65487		R02F11.1	14
185330_s_at	243.948	131.96	-1.84866		R02F11.3	5
178510_at	243.329	104.081	-2.33788		R03C1.1	1
193894_at	1427.88	903.108	-1.58108		R03D7.1	20
186827_s_at	286.426	174.826	-1.63835		R03D7.4	5
192820_at	727.149	373.484	-1.94693	gst-5	R03D7.6	1
192708_s_at	189.404	101.246	-1.87073	sym-4	R03E1.1	1
174840_s_at	231.025	359.95	1.55806	abts-4	R03E9.3	8
192392_at	227.23	108.546	-2.09339	sek-1	R03G5.2	1
192915_at	73.6232	48.5361	-1.51688	twk-13	R04F11.4	15
182944_at	377.394	213.541	-1.76732		R05A10.2	6
183248_at	167.916	291.206	1.73423		R05A10.4	8
184423_at	94.7445	59.9806	-1.57958		R05C11.1
188249_at	373.793	200.158	-1.86749		R05C11.3	1
191461_at	301.674	175.453	-1.7194		R05D11.4	2
182400_at	205.872	122.717	-1.67762		R05D11.7	2
176820_at	88.4684	58.3887	-1.51516		R05D3.11	2
187574_at	222.676	141.565	-1.57296		R05D3.2	5
189923_s_at	1574.4	832.5	-1.89117		R05F9.10	5
193996_at	76.2726	30.404	-2.50863		R05H10.2	5
191364_at	325.797	191.118	-1.7047		R05H10.5	3
190177_at	283.043	160.764	-1.76062	cdh-7	R05H10.6	14
175736_at	1088.69	618.86	-1.75918	gsa-1	R06A10.2	3
189312_at	171.623	60.3481	-2.84388		R06A10.4
178895_at	117.35	62.4661	-1.87863		R06C7.1	7
188316_s_at	426.436	262.469	-1.62471	cdl-1	R06F6.1	11
192841_at	94.4951	59.7923	-1.58039		R06F6.2	2
187392_s_at	281.22	164.418	-1.71039	npp-19	R06F6.5	11
186490_at	263.867	576.11	2.18334		R06F6.7	6
174248_at	57.8239	87.5758	1.51453	vab-15	R07B1.1
186788_s_at	212.476	123.703	-1.71762		R07B1.9	1
176578_s_at	208.281	122.906	-1.69464	kin-2	R07E4.6	1
189726_at	678.857	362.257	-1.87396	rnp-4	R07E5.14	5
188912_s_at	785.79	237.384	-3.3102	cdc-42	R07G3.1	5
187223_at	222.518	134.628	-1.65284		R07G3.7	11
173042_s_at	60.9356	25.7616	-2.36536	grd-1	R08B4.1	14
184612_s_at	281.629	144.914	-1.94343		R08C7.10	11
180310_s_at	367.776	206.095	-1.7845		R08C7.2	2
192062_at	305.991	183.868	-1.66419		R08D7.6
171862_s_at	245.781	386.609	1.57298		R08E3.1
183914_s_at	103.836	49.4938	-2.09796		R08E3.3	5
190402_at	229.94	73.1332	-3.14413		R08E3.4
189519_at	99.0855	197.072	1.98891		R08F11.3	24
190561_at	224.53	108.634	-2.06685	tag-147	R09A8.3	5
172437_x_at	38.9698	76.5548	1.96446	cnc-2	R09B5.3	15
192190_at	157.363	304.05	1.93216		R09B5.6	22
184191_at	542.683	1279.87	2.35842	cnc-4	R09B5.9	15
192168_at	242.794	126.717	-1.91603	nhr-1	R09G11.2	10
190429_at	751.014	1145.66	1.52548		R09H10.3	8
190856_s_at	212.83	134.25	-1.58532		R107.4	2
186323_at	102.667	64.2499	-1.59793		R10D12.14	2
180810_at	80.8969	133.254	1.64721		R10D12.9	8
191123_s_at	129.511	57.9482	-2.23495	cbp-1	R10E11.1	5
190514_at	127.694	66.1003	-1.93182		R10E4.11	12
193337_s_at	407.763	127.666	-3.19399		R10E4.2	1
192016_s_at	158.13	62.344	-2.53641	msi-1	R10E9.1	16
190234_at	516.2	813.145	1.57525		R10H1.1	6
188958_at	470.589	237.718	-1.97961		R119.3	2
190193_s_at	1762.68	1147.86	-1.53562		R11A5.7	16
189365_s_at	406.692	138.722	-2.93171		R11A8.7	5
182735_at	322.658	150.559	-2.14307		R11B5.1	13
185021_at	130.986	316.646	2.4174	pqn-60	R11G11.7	21
189847_at	589.487	286.321	-2.05883		R12A1.3	14
179869_at	346.511	175.639	-1.97286	mdt-15	R12B2.5	1
172547_x_at	3302.12	1946.12	-1.69677		R12E2.14	16
172346_x_at	1928.52	1096.33	-1.75907		R12E2.7	16
193897_at	116.992	210.447	1.79881		R12G8.1	0
191823_s_at	145.961	56.7543	-2.5718	unc-9	R12H7.1	6
177118_s_at	387.874	173.681	-2.23325		R13.1	1
177125_at	105.148	60.3648	-1.74188		R13.4	1
181209_at	62.4536	30.2077	-2.06747		R13H7.2	6
188176_s_at	573.197	189.872	-3.01885	daf-16	R13H8.1	1
179544_at	179.109	56.7629	-3.15539		R148.2	2
179101_at	399.027	223.025	-1.78916		R148.3	5
179585_at	99.0646	53.5743	-1.84911		R151.1	1
192383_s_at	1947.68	1195.8	-1.62877		R151.2	2
192893_at	548.02	161.561	-3.39203		R153.1	6
173163_s_at	194.108	111.97	-1.73357		R166.5	9
190700_s_at	265.787	137.006	-1.93996	lin-46	R186.7
191621_s_at	271.517	168.513	-1.61125	sma-1	R31.1	1
190840_at	291.27	176.178	-1.65328		R53.7
189050_at	187.283	105.36	-1.77756		R74.6	5
190564_at	47.3126	90.4165	1.91104		R90.3	6
190467_at	47.7982	130.58	2.7319		R90.4	17
177148_s_at	102.422	20.0903	-5.09807		T01A4.1	1
191435_s_at	161.082	80.6377	-1.9976	oat-1	T01B11.7
177857_s_at	654.915	391.572	-1.67253		T01B7.5	5
177444_at	356.095	191.566	-1.85886		T01B7.6	2
177795_at	111.846	171.078	1.52958		T01C1.3	25
190604_at	508.362	279.747	-1.81722	aak-2	T01C8.1	1
181722_s_at	1049.41	577.316	-1.81773		T01D1.1	3
193398_s_at	224.911	141.456	-1.58997	rskn-1	T01H8.1	7
180463_s_at	384.733	126.579	-3.03946		T02C5.3	1
180097_at	310.782	153.999	-2.01808	unc-2	T02C5.5	1
187620_s_at	350.037	186.644	-1.87543		T02G5.13	2
181500_at	164.869	73.5585	-2.24134		T02H6.1	1
172351_x_at	264.924	115.999	-2.28386		T02H6.3
177899_at	65.8707	109.534	1.66286		T03D8.7
181162_s_at	600.211	321.107	-1.8692		T03F1.1	20
193632_s_at	136.729	35.9303	-3.8054	lis-1	T03F6.5	5
193936_at	261.018	151.47	-1.72323		T03G6.3
182091_s_at	156.853	265.109	1.69017		T04A11.1	8
189916_at	47.9036	76.1926	1.59054	him-6	T04A11.6	7
182798_at	304.115	552.112	1.81547		T04A6.1	15
193084_s_at	306.566	97.8705	-3.13236	epn-1	T04C10.2	1
192027_s_at	1440.63	799.936	-1.80093	atf-5	T04C10.4	1
AFFX-Ce_Actin_5_f_at	4839.91	2499.71	-1.93619	act-3	T04C12.4
180969_s_at	228.498	139.97	-1.63248		T04C9.1	5
188384_s_at	322.311	134.456	-2.39715		T04D1.4	5
179274_at	253.06	145.525	-1.73894		T04F8.6	1
190766_s_at	1684.14	684.085	-2.46189	nas-15	T04G9.2	14
192475_s_at	618.851	333.737	-1.85431	ile-2	T04G9.3	5
193153_s_at	181.851	113.561	-1.60135	rad-50	T04H1.4	11
193409_at	324.317	211.201	-1.53559	lrx-1	T04H1.6	14
189718_at	56.0217	215.245	3.84217	tbb-6	T04H1.9	8
178952_at	53.0617	95.0575	1.79145		T05A1.4	28
194009_at	331.507	126.952	-2.61128	sma-9	T05A10.1	1
175786_at	560.921	921.995	1.64372	cki-1	T05A6.1	1
172926_x_at	473.004	238.036	-1.98711		T05A7.9	1
182573_at	2764.32	1609.55	-1.71745		T05B4.3	14
181719_at	73.769	37.4383	-1.97041		T05C12.4
192888_s_at	1461.15	927.836	-1.5748		T05D4.1
184116_s_at	1040.69	557.353	-1.86719		T05E12.6	19
175398_s_at	140.827	268.682	1.90789	dhs-4	T05F1.10	8
192035_s_at	363.762	179.474	-2.02682	hsr-9	T05F1.6	5
190412_s_at	4238.81	2734.81	-1.54994	ech-6	T05G5.6	2
192891_s_at	455.898	281.394	-1.62014		T05H10.1	11
193710_at	466.634	244.599	-1.90776		T05H4.6	20
185530_s_at	81.7773	43.4297	-1.88298		T06A10.1	5
193542_at	79.8867	41.7591	-1.91304	nhr-84	T06C12.7	6
180048_at	398.274	168.954	-2.35729		T06D10.1
178918_at	1060.85	612.388	-1.73233		T06D8.1
179308_s_at	557.53	341.402	-1.63306		T06D8.3	1
177647_s_at	570.112	342.921	-1.66252		T06E4.8	29
172207_x_at	604.884	349.954	-1.72846		T06E4.9	29
180679_at	124.039	194.405	1.56729		T06E6.10	8
192285_at	776.508	470.369	-1.65085	vbp-1	T06G6.9	20
188215_at	94.4393	54.9286	-1.71931	daf-18	T07A9.6	7
192063_s_at	184.442	105.237	-1.75263	fox-1	T07D1.4	1
179952_at	378.072	197.299	-1.91624	alg-2	T07D3.7	5
175076_s_at	127.137	82.7978	-1.53552	rha-1	T07D4.3	2
192369_s_at	167.721	71.509	-2.34545		T07D4.4
189458_s_at	219.382	126.265	-1.73747		T07F10.1	4
192607_at	754.336	342.78	-2.20064		T07F10.4	14
185111_s_at	472.04	310.473	-1.52039		T07F12.2	5
182510_at	80.1606	42.453	-1.88822		T07G12.3	14
183823_s_at	118.212	56.4615	-2.09367		T08A11.1	2
183604_at	513.337	285.713	-1.79669		T08A11.2	5
184176_at	1591.19	1017.28	-1.56415	tnt-4	T08B1.2	1
188487_s_at	4250.3	6690.93	1.57422	mtl-2	T08G5.10	8
192989_at	138.797	81.8272	-1.69623		T09A5.12
192468_at	334.093	170.705	-1.95713	klp-3	T09A5.2
187556_s_at	484.383	189.255	-2.55942		T09B4.9	2
190338_at	238.67	121.633	-1.96221		T09F3.1	1
188947_at	209.823	816.184	3.88987		T09F5.9
189343_at	54.6349	107.226	1.96259		T09H2.1	15
182276_at	988.406	632.786	-1.56199		T10B10.4	6
181845_at	652.911	233.463	-2.79663		T10B5.3
182656_at	1609.1	907.157	-1.77379		T10B5.5	9
189581_at	73.1523	24.6652	-2.9658		T10B9.7	24
191077_at	37.8966	60.2492	1.58983	sri-54	T10D4.8	3
191923_at	408.436	213.386	-1.91407		T10F2.2	2
176753_s_at	84.5374	52.0881	-1.62297	ulp-1	T10F2.3	2
187371_at	563.659	340.669	-1.65457		T10F2.4	5
189790_s_at	401.568	229.574	-1.74919	hum-6	T10H10.1	1
189402_s_at	1492.71	863.481	-1.72871	pmp-5	T10H9.5	8
186022_at	171.95	78.3753	-2.19394		T12A2.15	1
189733_at	355.107	199.849	-1.77688		T12A2.8	5
189688_at	908.679	1575.36	1.73368		T12B3.3	8
183763_at	232.164	137.636	-1.6868		T12B3.4	30
192544_s_at	345.054	210.107	-1.64228		T12D8.1	5
190190_s_at	230.245	135.928	-1.69388	drp-1	T12E12.4	5
190379_at	464.003	288.673	-1.60736		T12E12.6	3
182248_at	363.437	167.047	-2.17565	pqn-64	T12F5.5	5
171737_x_at	1162.42	1823.68	1.56887		T12G3.1	1
190396_s_at	93.6366	53.0084	-1.76645		T13A10.10
185109_at	177.792	94.2498	-1.88639	nlp-16	T13A10.5	9
193834_at	308.608	168.702	-1.82931	snf-3	T13B5.1	9
188095_at	117.944	62.0254	-1.90154	ric-3	T14A8.1	1
177750_at	351.101	209.188	-1.6784		T14B1.1	17
190598_at	280.824	442.828	1.57689	tsp-10	T14B4.4	8
181057_at	69.6438	45.7199	-1.52327		T14F9.2	13
188015_at	240.151	144.123	-1.66629	peb-1	T14F9.4	1
184664_at	197.095	117.279	-1.68056		T15B12.1
188500_at	125.663	294.668	2.3449	col-142	T15B7.4
188469_at	78.6603	157.409	2.00112	col-141	T15B7.5	16
188257_at	186.948	46.5732	-4.01408		T15H9.1	1
192278_s_at	367.944	201.183	-1.8289		T16A9.4	9
178563_at	134.613	89.3481	-1.50661		T16G1.6	19
189140_s_at	110.733	32.3231	-3.42582		T16G12.1
187262_at	73.7063	47.9999	-1.53555		T16H12.3	2
193938_s_at	215.791	110.212	-1.95796		T16H12.5	5
188597_s_at	134.321	72.0379	-1.86459	kin-18	T17E9.1	5
188158_at	630.374	342.662	-1.83964	gei-16	T17H7.4	1
173020_s_at	507.49	218.265	-2.32511		T19A5.1	2
190683_at	244.925	86.3488	-2.83646	gck-1	T19A5.2
183911_at	594.373	338.937	-1.75364		T19A5.3	14
177667_at	394.737	155.25	-2.54258		T19A6.1
181938_at	172.195	113.414	-1.51829	npp-7	T19B4.2	5
191891_at	571.396	325.247	-1.7568	prl-1	T19D2.2	1
172525_x_at	130.816	70.4404	-1.85712		T19E10.1	7
188421_at	305.995	91.0907	-3.35923	skn-1	T19E7.2	2
181053_s_at	427.463	225.01	-1.89975	bec-1	T19E7.3	11
183704_at	134.185	75.064	-1.7876		T20F5.7	11
175223_at	180.97	304.305	1.68152		T20G5.4	1
AFFX-r2-3026-5_at	2289.54	1457.43	-1.57094		T21B10.2
187933_s_at	383.898	213.882	-1.7949	dgn-1	T21B6.1	1
192312_s_at	911.825	601.502	-1.51591	unc-49	T21C12.1	1
193813_at	408.065	236.032	-1.72886		T21C9.12
190830_at	86.5994	158.144	1.82615		T21C9.8	15
189041_s_at	140.632	58.5845	-2.40051	pgp-6	T21E8.1	21
190711_at	208.938	100.522	-2.07853	glh-1	T21G5.3	11
181889_at	231.562	105.591	-2.19301		T21G5.5	1
188710_s_at	546.812	287.931	-1.89911	cmd-1	T21H3.3
190691_at	259.952	146.523	-1.77414		T22A3.2	14
178718_at	623.185	338.235	-1.84246		T22A3.4	1
191952_s_at	1652.33	957.642	-1.72541		T22B11.5	27
190076_at	712.686	294.62	-2.419		T22B2.4
193037_s_at	171.648	41.0797	-4.17841	egl-13	T22B7.1	0
181552_at	80.5619	210.74	2.61588		T22B7.3	1
177980_at	147.934	76.0264	-1.94583	jph-1	T22C1.7	1
188985_at	102.196	180.357	1.76482		T22C8.2	7
192372_at	79.2991	134.875	1.70084		T22C8.5	3
177583_at	231.382	129.04	-1.79311	vab-9	T22C8.8	6
192730_at	775.95	445.233	-1.7428		T22D1.3	2
180195_at	258.376	121.075	-2.13401		T22F3.2	5
191512_at	384.335	174.282	-2.20524		T22G5.5	5
178599_at	286.738	1403.55	4.89491	spp-12	T22G5.7	3
177762_at	193.447	314.587	1.62622	abf-5	T22H6.5	6
192981_at	80.4992	32.4649	-2.47957	gei-3	T22H6.6	38
182587_at	281.206	124.655	-2.25588		T22H9.2	1
189741_at	433.508	269.974	-1.60574		T23B12.2	2
181987_at	96.2654	284.843	2.95894		T23B3.6	15
179065_s_at	236.781	125.689	-1.88386		T23B5.1	11
178064_at	497.701	314.306	-1.58349		T23D8.3	2
189195_at	540.616	169.289	-3.19345		T23F11.1	2
190020_at	3152.48	1766.16	-1.78494		T23F2.1	14
182673_at	110.653	65.314	-1.69417		T23F2.2	1
182183_at	102.66	54.8624	-1.87122		T23G11.5
174108_s_at	268.549	133.816	-2.00686	snt-4	T23H2.2	6
188383_at	77.8252	41.0618	-1.89532		T23H2.3	11
192126_s_at	229.939	119.112	-1.93044	toh-1	T24A11.3	16
178621_at	718.256	363.887	-1.97384		T24B8.3	1
178297_at	183.004	281.061	1.53582		T24B8.5	19
184236_at	307.367	179.261	-1.71463		T24C12.4	14
189743_s_at	245.342	108.015	-2.27137	tag-156	T24F1.1	2
172236_x_at	762.916	1802.53	2.36269		T24F1.5	6
185346_s_at	227.129	118.303	-1.9199		T24G10.2	11
180818_at	497.137	255.049	-1.94918		T24H10.7
183918_s_at	231.316	139.815	-1.65445		T24H7.2	2
175017_s_at	235.834	398.225	1.68858		T24H7.5	1
193536_at	76.9071	116.912	1.52017	snf-12	T25B6.7	1
176101_at	70.4309	31.1843	-2.25854		T25D3.4
194083_s_at	315.913	135.514	-2.33122		T25E12.4	8
193109_s_at	170.573	108.141	-1.57733	dbl-1	T25F10.2	6
189186_at	109.24	71.2976	-1.53217	dhs-30	T25G12.7	8
184061_at	118.631	75.0372	-1.58096		T26A5.5	2
183297_at	317.216	201.968	-1.57063		T26A8.1	11
188251_at	63.4341	95.9048	1.51188	gcy-23	T26C12.4	13
189361_s_at	505.863	330.846	-1.529		T26C5.3
193702_s_at	265.423	170.589	-1.55592	par-6	T26E3.3	2
182703_s_at	795.407	425.039	-1.87137		T27A3.1	1
179928_s_at	2119.73	1334.58	-1.58831		T27C4.1	6
188149_s_at	140.657	90.4616	-1.55488	egr-1	T27C4.4	2
191788_at	651.194	360.99	-1.80391		T27D12.1	6
191496_s_at	1213.89	514.588	-2.35895		T27E9.7	1
181524_at	186.881	295.393	1.58065		T28B4.4	6
179200_at	580.568	338.485	-1.71519		T28C6.7
192045_s_at	619.614	274.42	-2.25791	unc-62	T28F12.2
183360_s_at	204.651	118.962	-1.7203		T28F2.4	1
191981_at	46.3819	72.4048	1.56106		T28F4.2	6
179053_at	112.528	61.4911	-1.82999		T28F4.4	9
183026_at	183.949	104.861	-1.75421		VM106R.1	6
181652_at	125.544	41.7233	-3.00896		VT23B5.1	1
185846_at	577.481	306.144	-1.88631	unc-83	W01A11.3	1
171828_x_at	496.47	761.925	1.53469	mdt-28	W01A8.1	5
194086_at	1623.71	747.61	-2.17187		W01F3.3	14
187941_at	166.844	81.4656	-2.04803	daf-5	W01G7.1	1
182423_s_at	303.867	184.277	-1.64897		W02A11.2	3
179437_s_at	1312.09	826.09	-1.58831	pqn-74	W02A2.3
193474_s_at	302.828	118.97	-2.54541		W02B12.9	2
172285_x_at	112.826	51.9604	-2.17138		W02B3.6	1
177480_at	352.561	204.663	-1.72264		W02B8.1	1
192793_s_at	440.626	153.022	-2.87949	hmr-1	W02B9.1
190299_at	229.391	88.3265	-2.59708		W02C12.3	1
185693_at	228.401	104.562	-2.18436		W02F12.2	1
182599_s_at	255.175	573.024	2.24561		W02G9.4	1
183687_at	109.848	44.1491	-2.48811		W03A5.4
183888_at	109.282	38.665	-2.82638	dnj-24	W03A5.7	1
182827_at	78.3735	349.871	4.46415		W03B1.6	12
177982_at	86.4867	137.446	1.58921		W03C9.1	4
189719_at	93.9503	43.6038	-2.15463	rab-7	W03C9.3	2
193019_s_at	60.5429	32.9239	-1.83887	lin-29	W03C9.4	1
182930_at	218.669	397.139	1.81616	pqn-75	W03D2.1	1
188096_s_at	263.847	152.234	-1.73317	wrt-5	W03D2.5
176516_s_at	143.991	95.1453	-1.51339	afd-1	W03F11.6	5
181867_s_at	450.116	270.6	-1.6634		W03F8.4	2
187494_at	65.1211	37.129	-1.75392		W03F9.1	5
185268_at	445.871	281.225	-1.58546		W03F9.10	5
181153_s_at	332.031	153.988	-2.15621		W03G11.4	1
178626_s_at	91.887	58.8029	-1.56263		W03H9.4	2
184167_s_at	308.387	189.464	-1.62768		W04B5.4	2
189104_s_at	78.1177	41.5487	-1.88015		W04B5.5	11
180426_at	796.504	529.335	-1.50473		W04C9.4	2
189086_s_at	904.082	418.817	-2.15865	atn-1	W04D2.1	16
193838_s_at	437.384	709.686	1.62257		W04E12.6	8
189258_at	101.18	62.4343	-1.62058		W04G3.6	31
177781_at	390.183	151.977	-2.56738		W05B5.1
173282_s_at	339.96	556.881	1.63808	tre-3	W05E10.4	8
181919_at	320.76	195.109	-1.644		W05H12.1	6
172303_x_at	576.126	120.292	-4.7894		W05H9.3	1
190792_s_at	2239.45	1001.87	-2.23527	ret-1	W06A7.3	1
191234_at	285.515	54.121	-5.27549	puf-9	W06B11.2	5
183620_at	78.5291	135.449	1.72482		W06B4.1	7
184923_at	383.03	241.676	-1.58489		W06E11.2
186330_at	64.4039	35.6877	-1.80465		W06E11.5
171995_x_at	1115.03	380.351	-2.93159	lit-1	W06F12.1
180912_at	330.444	109.014	-3.0312		W06H12.1
174413_at	361.372	173.307	-2.08515		W06H8.5
190692_at	176.273	279.984	1.58836		W07A12.4	17
184496_s_at	579.964	239.24	-2.42419	gei-4	W07B3.2
193247_at	277.882	560.807	2.01815		W07E11.2	6
175777_at	458.093	732.268	1.59851		W07E11.3	6
189661_at	370.585	165.378	-2.24084		W07E6.1	5
190475_at	203.127	64.6634	-3.1413		W07G4.3	5
187809_at	561.526	238.195	-2.35742		W08A12.1	0
184421_at	348.065	202.277	-1.72073		W08A12.3	14
190690_s_at	233.269	129.233	-1.80503		W08D2.5	5
184769_at	147.363	257.399	1.7467		W08E12.2
172545_x_at	1129.53	2777.07	2.45862		W08E12.4
184734_at	477.102	293.598	-1.62502		W08E12.6
188669_at	3737.13	2487.53	-1.50234		W08E12.7
173673_s_at	399.584	226.619	-1.76324		W08E3.2	5
183078_at	34.2002	60.3122	1.76351		W08F4.5	6
183837_s_at	226.993	105.438	-2.15285		W08F4.8	5
191709_at	234.75	84.1276	-2.7904		W08G11.4	1
190496_s_at	421.461	228.77	-1.8423		W09B6.1	5
184103_s_at	78.335	36.4742	-2.14768		W09B7.2
193798_s_at	363.595	220.951	-1.64559		W09D10.1	2
192619_at	68.3564	29.7781	-2.29553		W09D10.4	1
190170_s_at	246.662	422.124	1.71134	srg-54	W09D12.1	8
187833_s_at	136.649	66.6602	-2.04993	apd-3	W09G10.4	0
178785_s_at	181.485	101.172	-1.79382		W09H1.3	0
194001_s_at	327.897	154.876	-2.11716	lec-1	W09H1.6	1
180780_at	103.234	61.8392	-1.6694		W10C4.1
190718_s_at	189.223	123.24	-1.5354	mef-2	W10D5.1	9
193591_s_at	1559.39	901.191	-1.73036		W10D5.2
189599_at	110.536	44.1195	-2.50538		W10G11.16	13
176448_at	76.7278	122.651	1.59853		Y102A11A.1
185737_at	103.513	51.9015	-1.99441		Y102A5A.1	2
186568_s_at	39.0728	61.9431	1.58532		Y102A5C.13	3
186034_at	416.033	255.537	-1.62807		Y102E9.2	2
186768_at	78.8783	50.2899	-1.56847		Y105C5A.23
172620_x_at	1531.65	602.217	-2.54335		Y105C5B.12
176966_at	194.371	104.37	-1.86233		Y105E8A.12
175970_at	403.418	228.595	-1.76477		Y105E8A.19
175940_s_at	65.8827	31.4144	-2.09722		Y105E8A.20
173361_s_at	239.442	82.133	-2.9153		Y105E8A.24
176315_at	231.426	92.7481	-2.49521		Y105E8A.25
176420_at	88.1255	32.1912	-2.73757		Y105E8A.29
185572_at	242.202	130.021	-1.86279		Y105E8A.3
172129_x_at	248.191	85.4023	-2.90614	apt-1	Y105E8A.9
176396_s_at	718.587	443.072	-1.62183	lev-11	Y105E8B.1
176427_s_at	157.378	87.6348	-1.79583		Y105E8B.2
176405_at	118.115	42.2632	-2.79475		Y105E8B.4
175501_at	175.246	96.6805	-1.81263	csnk-1	Y106G6E.6	5
176551_s_at	73.8922	27.1523	-2.7214	cul-3	Y108G3AL.1
176815_at	195.678	94.2347	-2.0765		Y10G11A.1
187441_at	99.1493	160.664	1.62042		Y110A2AL.2
175367_s_at	172.982	322.003	1.86148		Y110A2AL.4
187353_s_at	1105.73	517.634	-2.13612	ptc-3	Y110A2AL.8
186771_at	113.519	33.9744	-3.34131		Y111B2A.11
174156_s_at	63.6746	29.0604	-2.19111		Y111B2A.12
186777_s_at	108.66	47.8013	-2.27316	pqn-80	Y111B2A.14
189582_s_at	988.085	460.562	-2.14539	rsp-3	Y111B2A.18
176850_at	433.184	288.428	-1.50188		Y111B2A.20
173615_s_at	80.5191	49.8288	-1.61591		Y111B2A.8	1
186833_s_at	100.168	56.7683	-1.7645	ttx-1	Y113G7A.6
174653_s_at	3663.11	2198.39	-1.66627		Y113G7B.17	5
187072_at	68.587	30.3547	-2.25952		Y113G7B.21	0
184953_at	51.2075	85.4859	1.6694		Y113G7B.3
184978_at	878.648	381.011	-2.30609	map-2	Y116A8A.9	2
186857_at	218.703	120.394	-1.81656	arf-6	Y116A8C.12	0
185125_at	49.0464	78.5768	1.60209		Y116A8C.8	0
188437_s_at	533.672	255.042	-2.09249	gly-4	Y116F11B.12
188756_s_at	181.592	298.889	1.64593	pcp-4	Y116F11B.3
186651_at	63.2599	38.6102	-1.63842		Y119C1A.1
176250_s_at	189.781	89.0744	-2.13059		Y119C1B.8
176137_at	168.906	62.2415	-2.71372		Y119D3B.12
173645_s_at	1675.14	917.314	-1.82614		Y119D3B.15
176130_at	137.16	78.6455	-1.74403	pes-4	Y119D3B.17
176166_s_at	69.9585	108.646	1.553		Y119D3B.6
182839_at	115.003	195.522	1.70014		Y11D7A.3
182561_at	802.295	491.157	-1.63348		Y11D7A.9
184117_at	121.644	70.1673	-1.73362		Y12A6A.2	6
193433_at	314.526	193.665	-1.62408	nhr-91	Y15E3A.1
190786_s_at	1100.83	2081.27	1.89064		Y16B4A.2
182439_at	525.195	986.704	1.87874		Y17D7B.4	8
184256_s_at	222.062	100.232	-2.21547		Y17G7B.17	1
172493_x_at	363.893	166.493	-2.18563		Y17G7B.2
175507_at	1672.77	861.226	-1.94231		Y17G7B.20
192783_at	1343.01	769.165	-1.74606	tpi-1	Y17G7B.7
187889_at	254.481	102.927	-2.47244	pad-1	Y18D10A.13	1
186915_at	369.829	169.61	-2.18047		Y18D10A.17	11
191116_at	147.747	79.1232	-1.8673		Y18D10A.9	0
180592_s_at	839.231	417.248	-2.01135		Y19D10A.9
176352_at	3592.97	2139.61	-1.67927		Y22D7AL.10
175619_s_at	2813.58	733.894	-3.83378	hsp-60	Y22D7AL.5
173642_at	130.098	237.151	1.82287		Y22D7AR.6
189128_s_at	477.622	280.62	-1.70202		Y22F5A.3	6
191242_s_at	469.389	211.504	-2.21929	crs-1	Y23H5A.7	5
176905_at	261.793	100.3	-2.61011		Y24D9A.1
191428_s_at	920.074	536.085	-1.71628		Y25C1A.5	30
186645_s_at	298.415	121.611	-2.45384		Y25C1A.7
194019_at	548.188	215.28	-2.54639		Y32F6A.3	11
186754_at	249.718	85.8537	-2.90865		Y32H12A.5
186812_s_at	63.5006	29.9497	-2.12024		Y32H12A.8
177067_s_at	218.351	361.087	1.6537		Y34B4A.5
176941_at	121.232	61.3663	-1.97555		Y34D9A.10
187877_s_at	121.994	67.1193	-1.81756	spd-1	Y34D9A.4
180736_s_at	437.067	247.346	-1.76703	lst-3	Y37A1B.1	5
190116_s_at	152.119	64.9167	-2.34329		Y37A1C.1	5
173564_at	283.849	431.923	1.52167		Y37D8A.4	8
177293_s_at	142.243	68.6595	-2.07172		Y37E11AL.3
177344_at	217.729	88.3542	-2.46427		Y37E11AL.7
177291_at	183.927	44.7562	-4.10953		Y37E11AM.3
172122_at	69.2092	107.728	1.55656	unc-33	Y37E11C.1	1
182055_at	84.7052	54.8323	-1.54481		Y37H9A.1	0
187162_s_at	676.339	326.09	-2.07409		Y38A10A.2	14
186640_s_at	266.935	159.617	-1.67235		Y38C1AB.4
186726_at	554.402	279.488	-1.98364		Y38E10A.13
188188_s_at	1034.85	287.419	-3.60047	ptr-18	Y38F1A.3	16
175685_s_at	2189.78	1212.13	-1.80655	vha-11	Y38F2AL.3
177110_s_at	2728.86	565.906	-4.82211	vha-3	Y38F2AL.4
176353_s_at	2933.76	1404.74	-2.08848		Y38F2AR.2
176389_s_at	89.7557	50.3622	-1.7822		Y38F2AR.7
171817_x_at	3824.06	2476.66	-1.54404		Y38F2AR.9
192608_at	68.8823	114.802	1.66663		Y38H8A.5	0
186112_at	90.9793	34.2938	-2.65294		Y39A1A.5
183492_at	520.651	344.761	-1.51018		Y39A1A.9	14
186987_at	138.22	67.8972	-2.03573		Y39A3CR.3
173609_at	350.582	636.472	1.81547		Y39B6A.1
171762_x_at	60.0693	94.1208	1.56687		Y39B6A.16
185472_at	93.2892	31.2234	-2.9878		Y39B6A.2
183463_at	243.627	129.655	-1.87905		Y39B6A.33
183038_at	429.538	228.189	-1.88238		Y39B6A.39
183498_s_at	170.25	50.3386	-3.3821		Y39B6A.47
189066_s_at	722.995	398.122	-1.81601		Y39E4A.3	5
179978_at	534.379	218.779	-2.44256		Y39E4B.1	1
172021_x_at	612.279	267.433	-2.28947	gly-5	Y39E4B.12
174064_s_at	403.827	229.242	-1.76157	pqn-83	Y39E4B.13
186624_at	112.542	62.1863	-1.80976		Y39F10B.1
176453_at	90.7967	40.038	-2.26777		Y39G10AR.6
176446_s_at	1034.04	667.428	-1.54929		Y39G10AR.8
176726_at	63.2442	31.176	-2.02862		Y39G8C.1	5
181804_at	1222.43	596.888	-2.04801		Y40B1B.5	2
182059_s_at	70.7744	40.2446	-1.75861	spr-5	Y40B1B.6	2
189423_s_at	267.974	135.366	-1.97962	crh-1	Y41C4A.4	1
176153_at	229.597	63.2488	-3.63005	npp-8	Y41D4B.19
178174_s_at	352.816	158.342	-2.22819		Y41E3.7	5
184962_at	446.768	218.717	-2.04267		Y42G9A.4
176963_at	348.755	154.895	-2.25156	rig-4	Y42H9B.2
179727_at	112.56	396.169	3.51963		Y43C5A.3	15
183703_s_at	1406.91	796.598	-1.76615		Y43D4A.2
180988_at	103.601	182.409	1.76069		Y43F8A.1	6
176477_at	117.795	63.0548	-1.86813		Y43H11AL.1
176479_at	199.293	79.6713	-2.50144		Y43H11AL.2
185907_s_at	293.21	157.017	-1.86738		Y44E3A.6	5
184443_at	85.8179	242.496	2.8257		Y45F10D.2	21
186082_at	221.627	113.304	-1.95604		Y45F10D.7	5
188715_at	108.907	36.5744	-2.9777	rab-30	Y45F3A.2	18
191639_s_at	1794.22	1063.47	-1.68714		Y45G12B.1	2
177211_at	232.775	113.8	-2.04547		Y45G12B.2	5
177144_at	418.943	111.199	-3.76751	nhr-114	Y45G5AM.1
172184_x_at	86.7502	167.7	1.93314		Y46C8AL.2
177059_at	550.58	852.374	1.54814	clec-72	Y46C8AL.5
186498_s_at	892.792	502.178	-1.77784		Y46G5A.17
187618_at	467.618	308.441	-1.51607	gsy-1	Y46G5A.31
187467_s_at	589.004	314.3	-1.87402		Y46G5A.4
187631_at	263.54	98.1974	-2.68378		Y47D3A.21
184204_at	232.304	113.192	-2.0523	rab-35	Y47D3A.25
184203_at	476.367	283.972	-1.67752	smc-3	Y47D3A.26
191933_at	177.24	102.185	-1.7345		Y47D3A.29
175694_s_at	60.1724	22.5277	-2.67105	tra-1	Y47D3A.6
194030_s_at	1219.94	673.987	-1.81004	dpy-18	Y47D3B.10	1
185513_at	113.364	54.2608	-2.08925		Y47D3B.11
182743_at	1819.58	1126.59	-1.61512		Y47D3B.6	14
176458_at	80.3866	155.56	1.93515		Y47D7A.12
188388_at	486.678	208.422	-2.33505	spg-7	Y47G6A.10
186962_at	542.828	232.922	-2.33052		Y47G6A.18
173774_s_at	899.403	585.341	-1.53655		Y47G6A.19
186609_s_at	216.892	123.964	-1.74963	lpd-3	Y47G6A.23
189327_s_at	120.191	71.0524	-1.69158	ced-1	Y47H9C.4
190470_at	2207.11	1388.6	-1.58946		Y48A6B.3	20
180921_at	126.863	60.2324	-2.10622		Y48A6B.5	2
193927_s_at	733.467	1390.17	1.89534		Y48A6B.7	19
184377_at	191.211	126.474	-1.51186		Y48B6A.11	5
184234_s_at	561.023	362.628	-1.5471		Y48B6A.12	5
185129_at	153.61	88.2168	-1.74128		Y48C3A.14
185131_at	287.562	166.94	-1.72255		Y48C3A.16
185914_at	332.572	138.977	-2.39301		Y48C3A.20
182083_at	171.656	64.6764	-2.65407		Y48C3A.4
187793_s_at	221.479	133.748	-1.65594	mac-1	Y48C3A.7
182665_at	146.095	77.9796	-1.8735		Y48C3A.8
193524_at	239.759	112.298	-2.13503		Y48E1A.1
189745_s_at	182.456	110.394	-1.65276		Y48E1B.14
193739_s_at	142.21	87.7792	-1.62008		Y48E1B.3
183852_s_at	321.426	156.15	-2.05845		Y48E1B.5	13
177072_at	128.058	69.4917	-1.84279		Y48G1A.4
176981_s_at	179.532	63.2706	-2.83753	imb-5	Y48G1A.5
176975_s_at	188.386	89.5491	-2.10371		Y48G1C.7
176974_at	130.085	41.5589	-3.13013		Y48G1C.8
177031_at	508.522	305.534	-1.66437		Y48G9A.1
177035_at	65.9016	34.2818	-1.92235	ppk-2	Y48G9A.8
176936_at	114.221	54.507	-2.09554		Y48G9A.9
176819_s_at	211.514	46.1732	-4.58089		Y49C4A.8
189167_at	290.042	108.197	-2.68069	tat-1	Y49E10.11	3
186313_at	621.939	1003.51	1.61351		Y49E10.18	8
192436_s_at	276.731	162.849	-1.69931		Y49E10.19	4
184916_at	251.592	144.606	-1.73984		Y49F6B.2
173195_s_at	112.347	70.4421	-1.59488	smu-2	Y49F6B.4
180669_s_at	199.969	435.444	2.17756		Y4C6B.6	8
184444_at	224.982	72.4897	-3.10364		Y50C1A.1
185432_at	225.552	134.939	-1.67151		Y50D7A.8
185331_at	123.924	59.8157	-2.07177		Y50D7A.9
179786_at	45.7949	89.2147	1.94814		Y51A2B.1	8
185915_at	214.412	119.42	-1.79545	slo-1	Y51A2D.19
191098_at	416.29	245.253	-1.69739		Y51A2D.9	8
180981_at	172.878	109.607	-1.57726		Y51H1A.1	5
172511_x_at	374.752	588.743	1.57102		Y51H4A.24
193142_s_at	466.739	114.694	-4.06944	rho-1	Y51H4A.3
179879_at	33.4491	70.8982	2.11958		Y51H4A.5
186836_at	119.782	68.5469	-1.74745		Y52B11A.10
191962_s_at	153.796	76.0114	-2.02333	hsf-1	Y53C10A.12	5
190866_at	248.027	124.619	-1.99029		Y53C12A.4	2
186756_s_at	307.689	167.136	-1.84095	nos-3	Y53C12B.3	5
180660_at	130.387	58.5754	-2.22596	elo-9	Y53F4B.2
189884_at	362.095	172.763	-2.09591		Y53F4B.22
191393_s_at	1823.22	3012.02	1.65204	gst-27	Y53F4B.30
191337_at	278.628	421.411	1.51245	gst-39	Y53F4B.33
177218_at	56.7758	113.563	2.00019		Y53G8AM.5
186994_at	269.127	90.4957	-2.97392		Y53G8AR.3
187155_at	136.142	85.0155	-1.60138		Y53G8AR.8
185197_at	122.847	33.0481	-3.71721		Y53G8B.4
172093_x_at	366.607	162.943	-2.2499		Y54B9A.1
187195_at	569.066	310.809	-1.83092		Y54E10A.10
191451_at	386.771	252.722	-1.53042		Y54E10A.3
186587_s_at	120.583	36.2248	-3.32873		Y54E10A.6
185386_s_at	914.276	485.514	-1.88311	eif-3.B	Y54E2A.11	30
192895_s_at	94.8207	54.8813	-1.72774		Y54E2A.6	5
193316_s_at	142.801	88.8194	-1.60777		Y54E5A.7	5
188449_s_at	493.931	312.44	-1.58088	smp-1	Y54E5B.1	1
177280_at	281.163	137.514	-2.04461		Y54F10AL.1
176445_at	432.908	236.4	-1.83125	feh-1	Y54F10AM.2
176499_at	348.769	220.56	-1.58129	ceh-44	Y54F10AM.4
172148_x_at	284.505	138.089	-2.0603		Y54F10AM.7
185894_s_at	167.964	73.3536	-2.28979		Y54G11A.2	39
174184_at	431.557	180.606	-2.38949		Y54G2A.10
176953_at	76.7685	50.3021	-1.52615	lad-2	Y54G2A.25
176982_at	242.55	147.648	-1.64275		Y54G2A.26
177006_s_at	281.102	162.543	-1.7294		Y54G2A.29
176951_at	839.257	416.284	-2.01607	ubc-13	Y54G2A.31
187111_at	356.039	225.733	-1.57726		Y55B1AL.1
187020_s_at	107.309	45.916	-2.33708		Y55B1AL.3
186744_at	374.612	282.821	-1.57617	daf-2	Y55D5A.5	5
187454_at	78.5178	38.455	-2.04181		Y55F3AM.11
187537_s_at	342.955	173.604	-1.9755		Y55F3AM.12
187513_at	112.641	38.9896	-2.889	csn-4	Y55F3AM.15
186545_s_at	347.926	182.958	-1.90167		Y55F3AM.9
186685_at	181.587	85.754	-2.11754		Y55F3AR.1
186663_at	226.702	114.468	-1.98049		Y55F3AR.3
175977_s_at	358.147	141.099	-2.53826		Y55F3C.3
188739_at	2030.26	1201.65	-1.68957		Y55H10A.1	30
172842_x_at	1391.05	866.881	-1.60466		Y56A3A.19	18
183426_at	178.185	50.4764	-3.53006		Y56A3A.2	3
187619_s_at	405.713	133.515	-3.03871	ccf-1	Y56A3A.20	5
184449_at	3788.23	2215.69	-1.70973		Y56A3A.21	20
186408_at	71.1689	43.0591	-1.65282		Y56A3A.31	5
185024_s_at	86.6237	174.683	2.01657		Y56A3A.33	1
183874_s_at	100.244	59.0499	-1.69762		Y56A3A.7
187100_s_at	102.156	66.8408	-1.52834		Y57A10A.13
187059_at	387.568	181.3	-2.13771	pqn-87	Y57A10A.18
187000_s_at	321.648	187.143	-1.71873		Y57A10A.27
192211_at	67.6119	27.0057	-2.50361		Y57G11A.3	1
193652_s_at	5672.63	2782.3	-2.03883		Y57G11C.15	30
193793_s_at	1730.87	1070.44	-1.61698	eps-8	Y57G11C.24
189934_at	360.422	219.314	-1.64341		Y57G11C.3	18
184451_at	151.631	245.991	1.6223		Y57G7A.1	8
192066_at	198.801	113.589	-1.75018		Y58G8A.4
182778_at	439.473	242.215	-1.81439		Y59A8A.3
182830_at	296.624	101.032	-2.93595	dpy-21	Y59A8B.1
184286_at	90.5597	41.1014	-2.20332		Y59A8B.13
182845_s_at	127.995	60.3147	-2.12212		Y59A8B.7
173480_s_at	95.6877	184.258	1.92562	cyp-32B1	Y5H2B.5
184323_at	88.4993	53.4448	-1.6559		Y60A3A.14
173192_s_at	346.147	541.255	1.56366		Y60A3A.7
187479_s_at	1142.73	566.248	-2.01807		Y62E10A.13
188943_s_at	897.113	519.151	-1.72804	dnj-29	Y63D3A.6
176094_at	96.2389	28.6776	-3.35589		Y65B4A.6
186952_at	126.535	80.7528	-1.56694		Y65B4BL.2
189299_at	51.5107	83.5019	1.62106		Y65B4BR.1
187163_at	752.573	261.273	-2.8804		Y65B4BR.4
186927_s_at	2743.71	1374.31	-1.99643	grl-16	Y65B4BR.6
176696_at	146.27	50.2265	-2.91222		Y66A7A.2	2
193704_at	970.465	614.852	-1.57837		Y66H1A.4	0
175910_at	62.9186	28.4995	-2.20771		Y67D8A.1
176929_at	290.899	63.8275	-4.55759	mca-3	Y67D8C.10
176985_at	513.584	198.91	-2.582		Y67D8C.5
174429_at	64.6417	38.5178	-1.67823		Y69A2AR.16
176565_s_at	135.901	81.0824	-1.67608	ric-8	Y69A2AR.2
176284_s_at	396.727	142.308	-2.78781	mdf-2	Y69A2AR.30
188695_s_at	256.036	115.598	-2.21488		Y6B3A.1	2
183764_at	307.171	133.556	-2.29994		Y6B3B.10	1
179236_at	94.7284	49.1479	-1.92741		Y6B3B.9	2
186341_at	102.331	57.2222	-1.7883		Y71D11A.5
187185_at	67.0786	34.724	-1.93177		Y71F9AL.10
188492_s_at	514.906	259.205	-1.98648	arx-1	Y71F9AL.16
186753_at	2199.78	1045.4	-2.10425		Y71F9AL.9
177201_at	165.183	51.3171	-3.21887		Y71F9AM.3
176321_s_at	3240.75	1687.59	-1.92034		Y71F9AM.6
185920_at	1036.55	661.825	-1.56619		Y71F9B.3
176329_at	191.451	96.3709	-1.9866		Y71G12B.11
176411_s_at	462.632	206.211	-2.24349	ubc-3	Y71G12B.15
173726_s_at	124.061	64.4325	-1.92544		Y71G12B.23
176356_s_at	376.137	166.572	-2.2581		Y71G12B.24
176415_at	215.246	59.3625	-3.62596		Y71G12B.8
186532_at	251.583	47.039	-5.3484		Y71H10A.2
172177_x_at	63.623	170.696	2.68292		Y71H2AL.1
176266_s_at	809.133	442.234	-1.82965		Y71H2AM.11
176261_s_at	106.602	52.2877	-2.03876		Y71H2AM.17
176240_s_at	1208.24	767.623	-1.57401	EF-Tu1	Y71H2AM.23
176279_at	255.858	384.298	1.50199		Y71H2AM.6
176372_at	169.481	81.4358	-2.08116		Y72A10A.1
175929_s_at	281.228	141.168	-1.99214		Y73B3A.5
185418_at	255.223	136.079	-1.87555		Y73B6A.3
191672_s_at	224.672	99.9014	-2.24894	lin-45	Y73B6A.5
177225_at	2294.88	709.8	-3.23314		Y73B6BL.6
173974_s_at	117.2	74.8089	-1.56666	pqn-89	Y73B6BR.1
176887_at	98.8392	55.1202	-1.79316		Y73E7A.2
176888_at	258.737	153.475	-1.68586		Y73E7A.4
172022_x_at	277.871	180.779	-1.53708		Y73E7A.6
184098_s_at	1686.03	889.408	-1.89568		Y73F4A.2	6
184137_at	88.5318	49.8878	-1.77462		Y73F8A.5
176563_at	63.91	36.9005	-1.73195		Y74C10AM.1
176492_s_at	175.994	62.1212	-2.83308	eif-3.I	Y74C10AR.1
187719_at	265.979	134.747	-1.97392		Y74C9A.5
176244_at	106.733	66.4358	-1.60655		Y75B7AL.4
185094_at	86.5486	34.9943	-2.47322		Y75B8A.17	2
185399_at	93.0857	43.0532	-2.16211		Y75B8A.28	1
193195_at	266.532	137.46	-1.93899	pph-4.1	Y75B8A.30
179867_at	155.019	61.8885	-2.5048		Y75B8A.8	2
194091_s_at	145.032	88.2905	-1.64266	cua-1	Y76A2A.2	2
193613_s_at	301.949	172.257	-1.7529	pod-1	Y76A2B.1	5
187080_at	216.694	86.8921	-2.49383		Y76B12C.2
186626_s_at	274.712	137.936	-1.9916		Y77E11A.1
173612_s_at	451.777	278.439	-1.62254	npp-20	Y77E11A.13
191897_at	118.34	33.9767	-3.48298	wrs-1	Y80D3A.1
182742_at	393.447	191.188	-2.05791		Y80D3A.2
182253_at	250.162	82.1974	-3.04344		Y80D3A.5
192834_at	66.9422	43.1188	-1.5525		Y81G3A.3	5
173226_s_at	237.493	62.3785	-3.80729	rab-27	Y87G2A.4
173515_s_at	600.817	217.691	-2.75995	vrs-2	Y87G2A.5
189924_at	56.5135	116.492	2.06131		Y8A9A.2	10
176776_at	145.446	62.1577	-2.33996	cdh-12	Y92C3A.1
177034_s_at	567.208	193.068	-2.93787	uaf-1	Y92C3B.2
176190_at	88.2989	47.9683	-1.84078		Y92H12A.4
187801_at	789.301	361.69	-2.18226		Y92H12BR.8
177018_s_at	186.264	110.092	-1.69189		Y94H6A.5
185406_at	468.881	255.274	-1.83677		Y95B8A.2
176587_s_at	131.484	219.952	1.67285		Y97E10AR.3
172932_x_at	1500.71	856.985	-1.75115	unc-52	ZC101.2	1
189909_at	85.1554	41.9586	-2.02951		ZC123.3	1
186057_at	182.478	108.339	-1.68432		ZC123.4	3
177715_s_at	457.938	272.488	-1.68058		ZC13.3	14
184058_s_at	93.8208	52.7597	-1.77826		ZC155.3	2
181856_at	203.98	76.458	-2.66787		ZC190.4	1
192597_at	199.321	326.269	1.6369	glr-5	ZC196.7	6
184174_at	249.999	438.089	1.75236		ZC204.12	8
189769_at	169.672	283.14	1.66875		ZC21.3	16
182167_at	155.786	79.6227	-1.95655	gld-2	ZC308.1	5
180549_at	38.0941	75.6448	1.98574		ZC317.2	10
178669_s_at	61.3325	121.45	1.98019	ins-24	ZC334.3	6
189629_at	255.116	405.815	1.59071	col-176	ZC373.7	16
189376_s_at	55.895	89.0029	1.59232		ZC376.1	10
189598_s_at	431.244	269.189	-1.60201		ZC376.7	5
180427_at	32.9748	76.1324	2.3088		ZC395.5	15
192036_at	169.233	99.6184	-1.69881	spn-4	ZC404.8	7
174023_at	34.7117	63.0713	1.81701	nhr-11	ZC410.1	21
191418_at	430.696	252.683	-1.70449	ugt-16	ZC443.6
193499_s_at	84.7469	47.2875	-1.79216		ZC504.3	5
190748_at	297.483	129.122	-2.3039		ZC506.1
189251_at	525.455	223.876	-2.34708	sec-24.2	ZC518.2	5
193716_s_at	60.8618	32.9576	-1.84667	ccr-4	ZC518.3	1
187890_at	157.584	45.2447	-3.48293	ceh-18	ZC64.3	6
182104_at	2433.03	1339.04	-1.817		ZK1025.3	14
191710_at	800.931	452.156	-1.77136	pat-3	ZK1058.2	5
174745_at	767.849	1182.17	1.53959		ZK1067.6	1
183577_at	5164.11	2894.84	-1.7839	pqn-95	ZK1067.7	14
187475_at	398.991	147.238	-2.70984		ZK1073.1	15
190797_at	209.289	95.1747	-2.199	unc-16	ZK1098.10	1
189572_s_at	75.3202	45.1142	-1.66955	mut-7	ZK1098.8	11
175995_at	1554.98	2388.89	1.53628	pcp-1	ZK112.1	31
176869_s_at	168.35	40.6746	-4.13896	ncl-1	ZK112.2	1
172699_x_at	191.214	104.112	-1.83661		ZK1127.7	5
187840_s_at	292.006	162.069	-1.80174		ZK1127.9	5
182228_s_at	665.454	375.284	-1.7732		ZK1151.1	1
175129_at	167.973	261.818	1.55869	pqn-96	ZK1236.6	2
189089_at	114.227	40.2871	-2.83532	fzr-1	ZK1307.6	5
187582_at	722.573	1154.96	1.5984	nlp-11	ZK1320.10	6
189810_at	75.1772	121.528	1.61655		ZK1320.4	9
182966_at	2611.02	1661.66	-1.57133		ZK154.1	14
187567_at	415.581	180.592	-2.30121		ZK177.2	5
183308_at	80.6362	39.0523	-2.06483		ZK180.2	6
180664_s_at	1727.68	1024.28	-1.68673		ZK180.6	16
179599_at	133.13	79.5231	-1.67411		ZK228.4	19
189036_s_at	394.931	199.571	-1.9789	pmr-1	ZK256.1
188059_at	776.392	388.505	-1.99841	ptr-23	ZK270.1	6
190364_s_at	966.14	295.917	-3.2649	frm-1	ZK270.2
179609_at	121.56	295.403	2.4301		ZK287.3
193412_s_at	571.858	368.586	-1.55149	npp-10	ZK328.5	5
175895_at	193.291	83.2961	-2.32054		ZK353.1
176875_at	333.799	157.229	-2.12302		ZK370.5
188034_s_at	264.18	162.526	-1.62546	sax-3	ZK377.2	1
191835_s_at	544.883	354.307	-1.53788		ZK418.9	5
191842_at	390.302	234.9	-1.66157		ZK430.7	30
188716_s_at	591.733	341.581	-1.73234		ZK430.8	16
192144_s_at	266.098	410.964	1.54441	asm-2	ZK455.4	8
192809_s_at	191.871	86.1242	-2.22785	cul-2	ZK520.4	5
171998_x_at	595.479	380.759	-1.56393	unc-13	ZK524.2	6
188030_s_at	79.8737	162.103	2.0295	flp-15	ZK525.1	15
190285_at	163.46	93.4746	-1.74871		ZK54.1	1
185958_s_at	243.907	141.517	-1.72352		ZK546.17
179416_at	1117.55	678.211	-1.6478		ZK550.3	5
171775_x_at	155.123	236.781	1.5264		ZK596.1	6
177281_at	88.529	172.694	1.9507		ZK6.6	3
194136_s_at	168.793	66.4585	-2.53982		ZK617.1	1
179249_at	411.742	59.1202	-6.96448		ZK617.2	9
194077_s_at	895.985	585.222	-1.53102	unc-32	ZK637.8	1
176093_at	151.125	55.0784	-2.74382		ZK652.8	14
193671_at	154.683	84.6947	-1.82637	nhr-48	ZK662.3	1
192509_at	93.8418	188.54	2.00913	clec-60	ZK666.6	17
194066_s_at	47.3238	99.0611	2.09326	clec-61	ZK666.7	17
190943_at	1045.44	683.712	-1.52907		ZK669.4	5
189750_s_at	487.949	287.615	-1.69654		ZK673.2	8
192536_at	154.071	90.9606	-1.69383	ptc-1	ZK675.1	9
173824_at	312.673	588.054	1.88073		ZK682.2
187843_s_at	291.247	135.248	-2.15344		ZK686.2
192060_at	660.089	377.837	-1.74702	imb-4	ZK742.1	5
188314_at	61.7171	107.627	1.74388	ins-4	ZK75.1	8
181745_at	367.393	222.227	-1.65323		ZK783.1	1
192311_at	620.349	201.527	-3.07824	let-60	ZK792.6	1
177891_s_at	278.75	145.099	-1.9211	tag-145	ZK809.2	18
178652_at	519.775	1078.34	2.07462		ZK84.1	16
178529_at	94.9675	53.8508	-1.76353		ZK856.6	3
193391_at	148.171	83.0652	-1.78379	mel-26	ZK858.4	7
188821_at	323.608	214.049	-1.51184	syd-9	ZK867.1	1
189338_at	750.985	419.37	-1.79075	lec-3	ZK892.1	1
192879_s_at	460.976	295.536	-1.55979	gap-2	ZK899.8	1
193414_s_at	232.681	152.606	-1.52472	kin-1	ZK909.2	1
193348_s_at	1378.64	328.738	-4.19373	pas-7	ZK945.2	18
190720_at	109.341	52.0818	-2.0994		ZK970.1	6
190585_at	111.868	391.805	3.50239		ZK970.7	15
181623_at	1014.48	638.537	-1.58876	anc-1	ZK973.6
